# Supplementary material for: Floxed Il1rl2 Locus with mCherry Reporter Element Reveals Distinct Expression Patterns of the IL-36 Receptor in Barrier Tissues
Source: MDPI journal article supplement (doi:10.3390/cells13090787), 2024-05-06

## JENS-B: Screening and Reconfirmation of Recombinant Clones

### Sections:

1. PCR Screening Strategy
2. Reconfirmation of Expanded Clones by PCR
3. Confirmation of 3' Cassette Retention by DNA Sequencing
4. Confirmation of 5' Distal LoxP Retention by DNA Sequencing
5. Analysis of Gene Targeting by Real-time PCR
6. References

## 1. PCR Screening Strategy

Ten micrograms of the targeting vector was linearized and then transfected by electroporation of FLP C57Bl/6 (BF1) embryonic stem cells. After selection with G418 antibiotic, surviving clones were expanded for PCR analysis to identify recombinant ES clones. The Neo cassette in the targeting vector was removed during ES clone expansion.

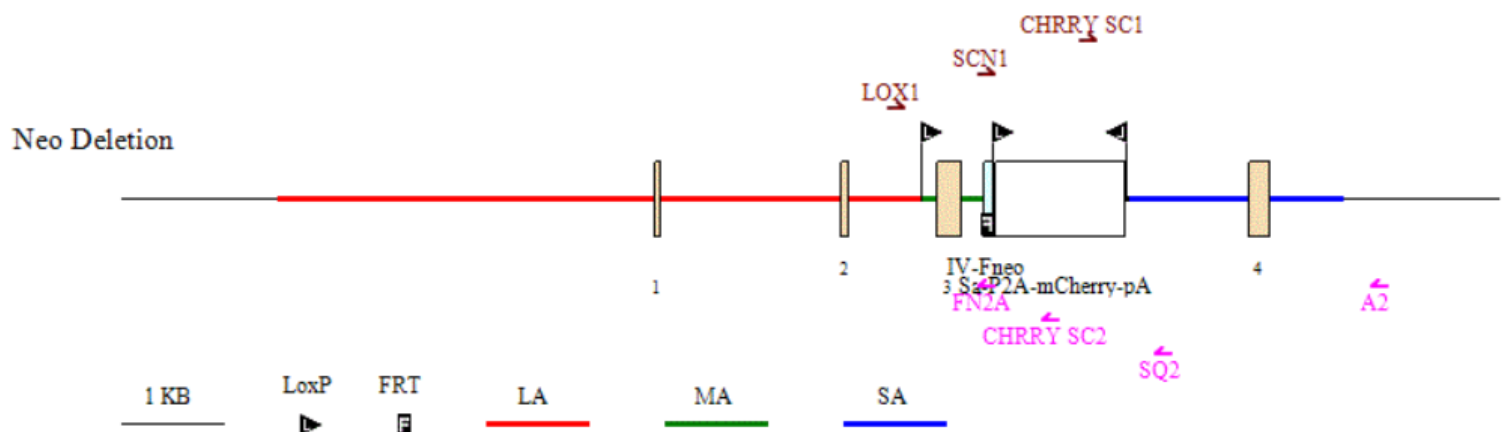

### Primers for PCR Screening

|            |                                        |     |
|------------|----------------------------------------|-----|
| A2:        | 5' - ACC TTC AAG GAC CTG TGT CAT TCC   | -3' |
| CHRRY SC1: | 5' - CAC CCT TGG TCA CCT TCA GCT TGG   | -3' |
| SQ2:       | 5' - CAT TAC CTC TGG CAC ATG GAT TC    | -3' |
| SCN1:      | 5' - CGT ACG TTC GTG GGA TTG TGT CC    | -3' |
| CHRRY SC2: | 5' - AAG CAG AGG CTG AAG CTG AAG GAC   | -3' |
| LOX1:      | 5' - AGG GAA GCT GTC TTT AGA ACC AAG C | -3' |
| FN2A:      | 5' - AAC TTC GCG ACA CGG ACA CAA TCC   | -3' |

Screening primer A2 was designed downstream of the short homology arm (SA) outside the 3' region used to generate the targeting construct. PCR reactions using A2 with the CHRRY SC1 primer amplify 2.82 kb fragment. Clones 163, 251, 323, 372, and 374 were identified as positive and selected for further expansion.

## 2. Reconfirmation of Expanded Clones by PCR

Clones 163, 251, 323, 372, and 374 were expanded and reconfirmed for SA integration. An "x" denotes expanded clones. DNA from an individual clone (before expansion) was used as a positive control and denoted as a (+). No DNA was used as a negative control, and denoted by a (--). Wild Type DNA was used as a negative control, and denoted by a (wt).

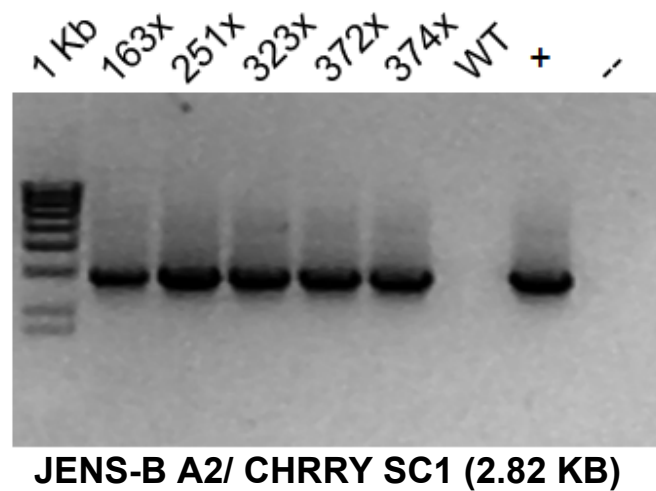

### 3. Confirmation of 3' Cassette Retention by DNA Sequencing

Confirmation of 3' cassette retention was performed by PCR using the SQ2 and SCN1 primers. This reaction produces a product 1.73 kb in size.

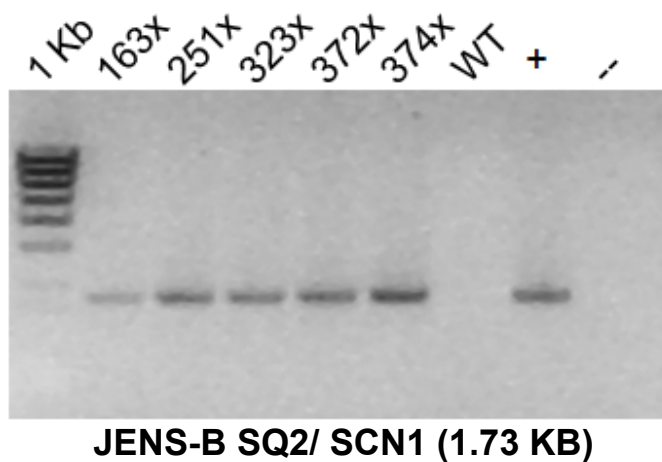

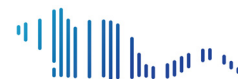

Sequencing was performed on purified PCR DNA to confirm the Sa-P2A-mCherry-pA/ genome junction using the CHRRY SC1 primer. The sequence from a confirmed clone is shown below (Query = sequence from clone #374; Sbjct = vector sequence).

```

Query  21      GCCCTCGCCCTCGATCTCGAACTCGTGGCCGTTACGGAGCCCTCCATGTGCACCTTGAA  80
          |||
Sbjct  18271    GCCCTCGCCCTCGATCTCGAACTCGTGGCCGTTACGGAGCCCTCCATGTGCACCTTGAA  18330

Query  81      GCGCATGAACTCCTTGATGATGGCCATGTTATCCTCCTCGCCCTTGCTCACCATAGGTCC  140
          |||
Sbjct  18331    GCGCATGAACTCCTTGATGATGGCCATGTTATCCTCCTCGCCCTTGCTCACCATAGGTCC  18390

Query  141     AGGGTTCTCCTCCACGTCTCCAGCCTGCTTCAGCAGGCTGAAGTTAGTAGCTCCGCTTCC  200
          |||
Sbjct  18391    AGGGTTCTCCTCCACGTCTCCAGCCTGCTTCAGCAGGCTGAAGTTAGTAGCTCCGCTTCC  18450

Query  201     GTCCTCACACGTATCTGGGGAAGGAAAGGaaacaataaaaataaaaataaaaataaa  260
          |||
Sbjct  18451    GTCCTCACACGTATCTGGGGAAGGAAAGGAAACAATAAAATAAAATAAAATAAAATAAA  18510

Query  261     ataaaataaaaataaaGGCAGAAAACCTGGAGTCATTATTCTTTTAGGGAATATTTTGCTC  320
          |||
Sbjct  18511    ATAAAATAAAATAAAGGCAGAAAACCTGGAGTCATTATTCTTTTAGGGAATATTTTGCTC  18570

Query  321     TGGTCAATGTGAAATTGCATTTAGGAGTTTGTATAACTTCGTATAGCATACATTATACGA  380
          |||
Sbjct  18571    TGGTCAATGTGAAATTGCATTTAGGAGTTTGTATAACTTCGTATAGCATACATTATACGA  18630

Query  381     ACGGTACGCGTAGGGCAGCCTTGAAGTGGCAGGAGATGACGTCCAGTGAGCACTTTTGAA  440
          |||
Sbjct  18631    ACGGTACGCGTAGGGCAGCCTTGAAGTGGCAGGAGATGACGTCCAGTGAGCACTTTTGAA  18690

Query  441     AGCAGAACAGCTTTAGAAATAACTTTTGGAGCACAGATTGCACCATCTTCTTCATTGAAG  500
          |||
Sbjct  18691    AGCAGAACAGCTTTAGAAATAACTTTTGGAGCACAGATTGCACCATCTTCTTCATTGAAG  18750

Query  501     TTTTAGCCCAGACCAGCTTACAGAGAGAGGTGTTTTATCAATGAGATTGCTGCCATTTC  560
          |||
Sbjct  18751    TTTTAGCCCAGACCAGCTTACAGAGAGAGGTGTTTTATCAATGAGATTGCTGCCATTTC  18810

Query  561     GAAGATGGCTAATGGTTTTGGAAAACCTGGCTGATCCAGACCCAACTAGATCATTCAAACA  620
          |||
Sbjct  18811    GAAGATGGCTAATGGTTTTGGAAAACCTGGCTGATCCAGACCCAACTAGATCATTCAAACA  18870

Query  621     CATCTGATAAGGAATCAGCTTAAGGCAGACATTTGAAAGCTAGCAAATCTGGGAGATGTT  680
          |||
Sbjct  18871    CATCTGATAAGGAATCAGCTTAAGGCAGACATTTGAAAGCTAGCAAATCTGGGAGATGTT  18930

Query  681     CTAGTGTCTACATGAATCCATGT  703
          |||
Sbjct  18931    CTAGTGTCTACATGAATCCATGT  18953

```

Sa-P2A-mCherry-pA cassette sequence is in orange text; Lox71 is highlighted cyan; genomic sequence is in plain text.

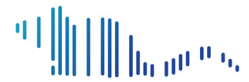

Sequencing was performed on purified PCR DNA to confirm Sa-P2A-mCherry-pA/ Neo cassette junction using the CHRRY SC2 primer. The sequence from a confirmed clone is shown below (Query = sequence from clone #374; Sbjct = vector sequence).

```

Query  19      GTC-AGACCACCTACAAGGCCAAGAAGCCCGTGCAGCTGCCCGGCGCCTACAACGTCAAC  77
      ||| |||||
Sbjct  17841    GTCAAGACCACCTACAAGGCCAAGAAGCCCGTGCAGCTGCCCGGCGCCTACAACGTCAAC  17782

Query  78      ATCAAGTTGGACATCACCTCCCACAACGAGGACTACACCATCGTGGAACAGTACGAACGC  137
      |||||
Sbjct  17781    ATCAAGTTGGACATCACCTCCCACAACGAGGACTACACCATCGTGGAACAGTACGAACGC  17722

Query  138     GCCGAGGGCCGCCACTCCACCGCGGCATGGACGAGCTGTACAAGTGAGCTCGCTGATCA  197
      |||||
Sbjct  17721    GCCGAGGGCCGCCACTCCACCGCGGCATGGACGAGCTGTACAAGTGAGCTCGCTGATCA  17662

Query  198     GCCTCGACTGTGCCTTCTAGTTGCCAGCCATCTGTTGTTTGCCCTCCCCCGTGCCTTCC  257
      |||||
Sbjct  17661    GCCTCGACTGTGCCTTCTAGTTGCCAGCCATCTGTTGTTTGCCCTCCCCCGTGCCTTCC  17602

Query  258     TTGACCCTGGAAGGTGCCACTCCCACTGTCCTTTCTAATAAAATGAGGAAATTGCATCG  317
      |||||
Sbjct  17601    TTGACCCTGGAAGGTGCCACTCCCACTGTCCTTTCTAATAAAATGAGGAAATTGCATCG  17542

Query  318     CATTGTCTGAGTAGGTGTCATTCTATTCTgggggggtgggggtggggCAGGACAGCAAGGGG  377
      |||||
Sbjct  17541    CATTGTCTGAGTAGGTGTCATTCTATTCTGGGGGGTGGGGTGGGGCAGGACAGCAAGGGG  17482

Query  378     GAGGATTGGAAGACAATAGCAGGCATGCTGGGGATGCGGTGGGCTCTATGGCTTCTGAG  437
      |||||
Sbjct  17481    GAGGATTGGAAGACAATAGCAGGCATGCTGGGGATGCGGTGGGCTCTATGGCTTCTGAG  17422

Query  438     GCGGAAAGAACCAGCTGGGGCTCGATCCTCTAGTCGAGGGGGCTAGAGTCGAGGCGCGCT  497
      |||||
Sbjct  17421    GCGGAAAGAACCAGCTGGGGCTCGATCCTCTAGTCGAGGGGGCTAGAGTCGAGGCGCGCT  17362

Query  498     AGTACCGTTCGTATAGCATACATTATACGAAGTTATCAATTGCGGTACGGTACCAACGAAG  557
      |||||
Sbjct  17361    AGTACCGTTCGTATAGCATACATTATACGAAGTTATCAATTGCGGTACGGTACCAACGAAG  17302

Query  558     TTCCTATTCTCTAGAAAGTATAGGAACTTCGCGACACGGACACAATCCC  606
      |||||
Sbjct  17301    TTCCTATTCTCTAGAAAGTATAGGAACTTCGCGACACGGACACAATCCC  17253
  
```

Sa-P2A-mCherry-pA cassette sequence is in **orange text**; Lox 66 sequence is highlighted **green**; the remaining Neo cassette sequence is in **red text**.

#### 4. Confirmation of 5' Distal LoxP Retention by DNA Sequencing

Confirmation of distal LoxP retention was performed by PCR using the LOX1 and FN2A primers. This reaction produces a product 0.90 kb in size.

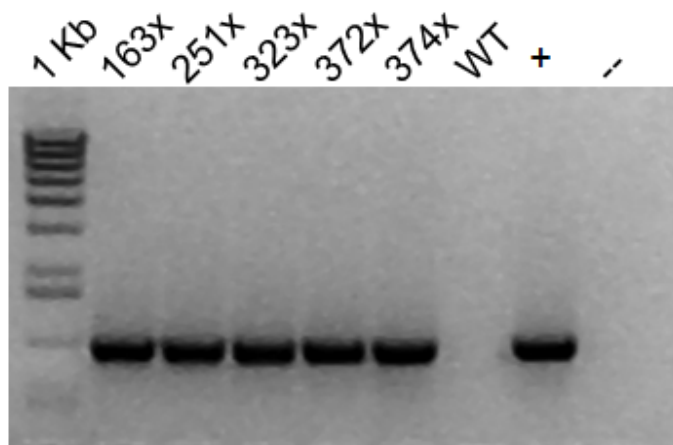

**JENS-B LOX1/ FN2A (0.90 KB)**



Sequencing was performed on purified PCR DNA to confirm presence of the distal LoxP cassette using the LOX1 primer. The sequence from a confirmed clone is shown below (Query = sequence from clone #374; Sbjct = vector sequence).

```

Query 16      TCTGNCTGC-AGTATAGGCAGG-AAACGACCAGGTTGGTTCTATGTTGAGACAGAGACTA 73
Sbjct 16421   TCTGACTGCAAGTATAGGCAGGAAAACGACCAGGTTGGTTCTATGTTGAGACAGAGACTA 16480

Query 74      AGGGCAGAAGAGTGAACAGATACAGACACAGGGGCCGTGGTTCTGTGGAGGGTCCTGGGG 133
Sbjct 16481   AGGGCAGAAGAGTGAACAGATACAGACACAGGGGCCGTGGTTCTGTGGAGGGTCCTGGGG 16540

Query 134     AAGCCTTGTCCTCACTATACATTGAAGGTCTTAGCATTATGCTTCTAAATGACTGGGCT 193
Sbjct 16541   AAGCCTTGTCCTCACTATACATTGAAGGTCTTAGCATTATGCTTCTAAATGACTGGGCT 16600

Query 194     AGTTTGGGGAAACACCCCAAATACTTCGTATAATGTATGCTATACGAAGTTATGTACAA 253
Sbjct 16601   AGTTTGGGGAAACACCCCAAATAACTTCGTATAATGTATGCTATACGAAGTTATGTACAA 16660

Query 254     ACTCCTAAATGCAATTTACATTGACCAGAGCAAAATATTCCTAAAAAGAATAATGACT 313
Sbjct 16661   ACTCCTAAATGCAATTTACATTGACCAGAGCAAAATATTCCTAAAAAGAATAATGACT 16720

Query 314     CCAGTTTCTGCGCtttattttattttattttattttattttattttattttattgttttC 373
Sbjct 16721   CCAGTTTCTGCGCTTATTTTATTTTATTTTATTTTATTTTATTTTATTTTATTTTATTGTTTC 16780

Query 374     CTTTCCTTCCCCAGATACGTGTGAGGACATTTTATGCACAATGTGATAATTTAGAGGG 433
Sbjct 16781   CTTTCCTTCCCCAGATACGTGTGAGGACATTTTATGCACAATGTGATAATTTAGAGGG 16840

Query 434     CCAGCCTTTTCCTTTCAACTGCACATACCCGCCAGAAACAAACGGGGCAGTAAATCTGAC 493
Sbjct 16841   CCAGCCTTTTCCTTTCAACTGCACATACCCGCCAGAAACAAACGGGGCAGTAAATCTGAC 16900

Query 494     ATGGTACAAAACACCTAGCAAAAGCCCAGTATCTAACAACAGACACCTTAGAGTTCACCA 553
Sbjct 16901   ATGGTACAAAACACCTAGCAAAAGCCCAGTATCTAACAACAGACACCTTAGAGTTCACCA 16960

Query 554     GGACCAGACCTGGATCTTGTTTCTCCATTGACACTGGAGGACTCCGGTATCTATCAGTG 613
Sbjct 16961   GGACCAGACCTGGATCTTGTTTCTCCATTGACACTGGAGGACTCCGGTATCTATCAGTG 17020

Query 614     TGTATAAGGTAAGTCCTTCATTTAAAGTGGAACATAATCCCAAGTCTCCCTCTCCATTT 673
Sbjct 17021   TGTATAAGGTAAGTCCTTCATTTAAAGTGGAACATAATCCCAAGTCTCCCTCTCCATTT 17080

Query 674     CTAAAGACAACCTTTTTAAGAAAAATGGGTATTATTGGCCTTTATTTTGGAGACTTGTTATA 733
Sbjct 17081   CTAAAGACAACCTTTTTAAGAAAAATGGGTATTATTGGCCTTTATTTTGGAGACTTGTTATA 17140

Query 734     TAGCCTANACAAGTTTCCAACGCTTTCTAAAGTACTGAAAGGACAGGTGTGAACCACCA 793
Sbjct 17141   TAGCCTAGACAAGTTTCCAACGCTTTCTAAAGTACTGAAAGGACAGGTGTGAACCACCA 17200

```

Genomic sequence is in plain text; distal LoxP is highlighted yellow.

Clones 163, 251, 323, 372, and 374 were further analyzed by real-time PCR.

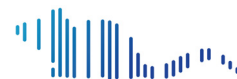



## 5. Analysis of Gene Targeting by Real-time PCR

### A. Gene Targeting Analysis

Analysis of clones for gene targeting using a probe which anneals to wild type allele and corresponds to the target site is shown below. The WT sample is indicated as BF1.

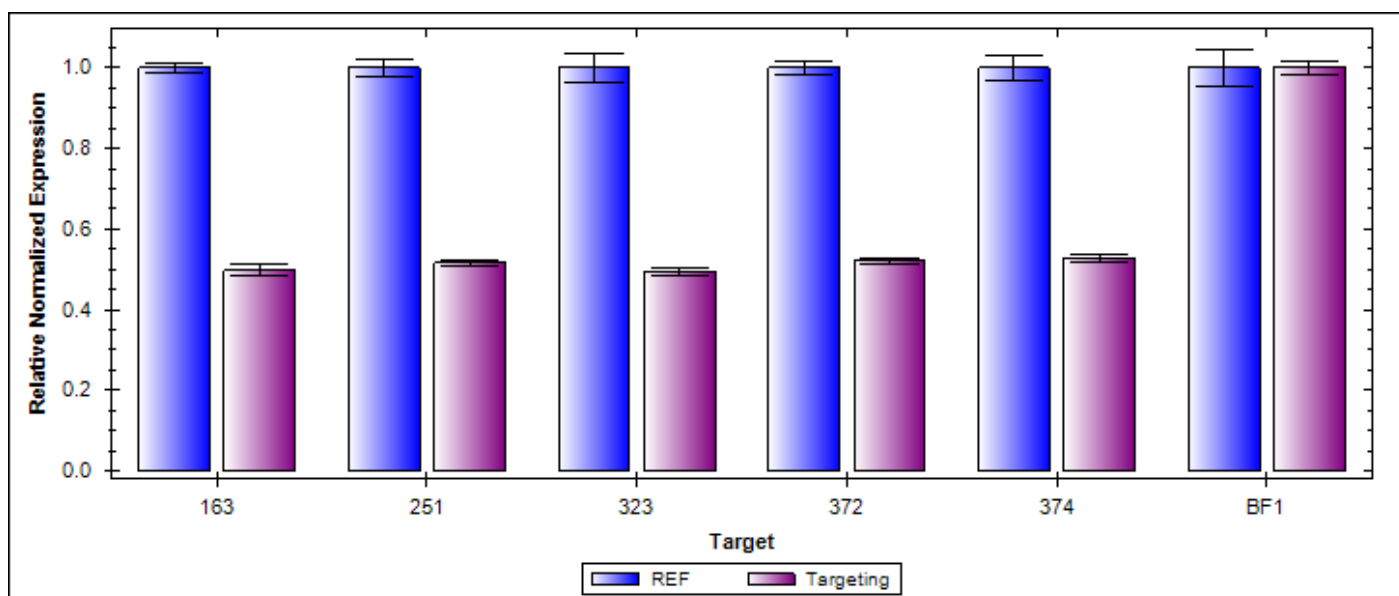

### B. Integrated Copy Number Analysis

Analysis of clones for copy number using a probe annealing to the 5' homology arm region is shown below. The WT sample is indicated as BF1.

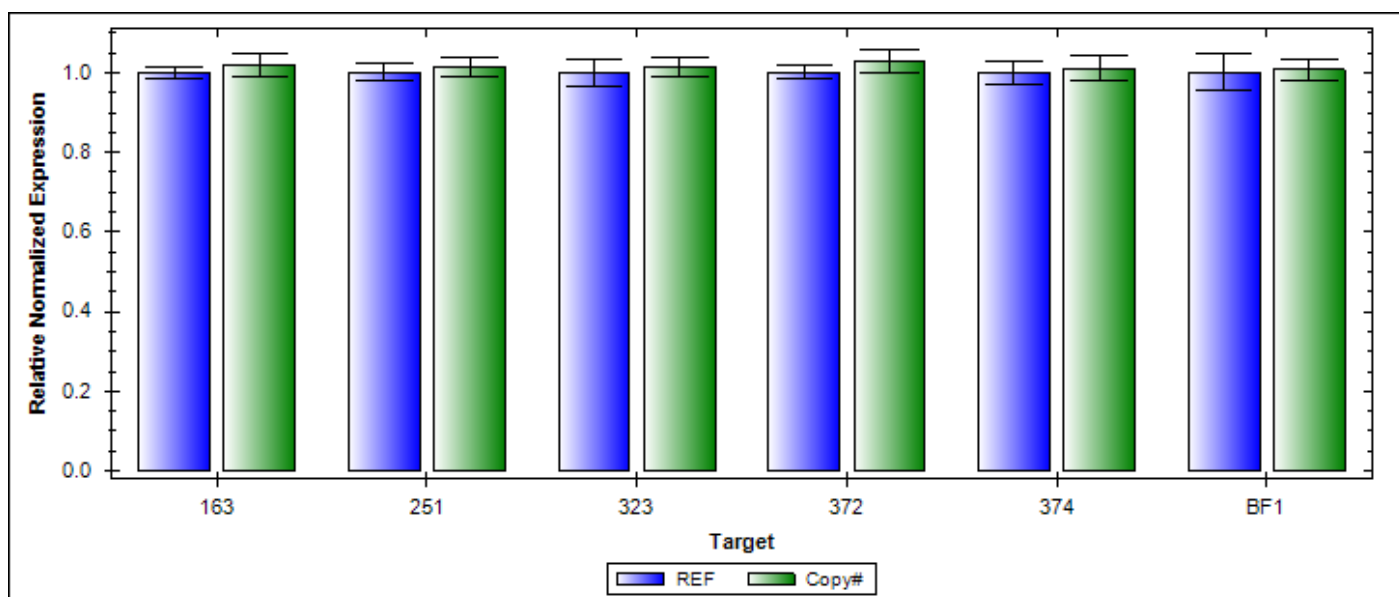

**Result:** Clones 163, 251, 323, 372, and 374 are correctly targeted and carry a single copy of the vector sequence integrated through gene targeting.



Clones 163, 251, 323, 372, and 374 are recommended for injection.



## 6. References

Below are references for the 1 kb and 100 bp ladders.

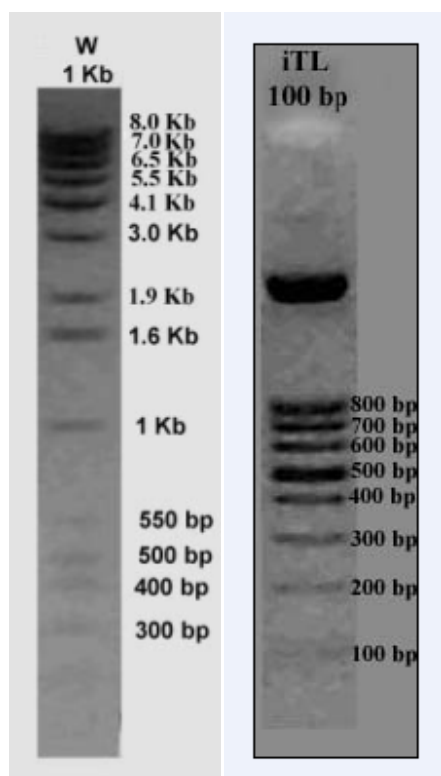

Supplement: s1 [file s1]
