# Supplementary material for: Floxed Il1rl2 Locus with mCherry Reporter Element Reveals Distinct Expression Patterns of the IL-36 Receptor in Barrier Tissues
Source: MDPI journal article supplement (doi:10.3390/cells13090787), 2024-05-06
Supplement: s1 [file s1]

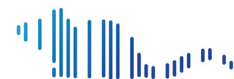

## JENSEN: Construction of Il1rl2 cKO And mCherry KI Targeting Vector

### Sections:

1. Vector Design Outline
2. Sequence Data Analysis
3. Cassette Sequences

### 1. Vector Design Outline

A 9.4 kb region used to construct the targeting vector was first sub cloned from a positively identified C57BL/6 BAC clone (RP23-216C5) using a homologous recombination-based technique. The region is designed in such a way that the long homology arm (LA) extends ~6.2 kb 5' to the distal LoxP cassette and the short homology arm (SA) extends ~2.1 kb 3' to the inversion cassette. A FRT-flanked Neo cassette was inserted downstream of exon 3 and placed immediately upstream of the inversion cassette.

The targeting vector was confirmed by restriction analysis and sequencing after each modification step. The boundaries of the 2 homology arms were confirmed by sequencing with P6 and T73 primers that read through both sides of the backbone vector into the genomic sequences. IV-Neo N3 and iNeo N2 primers read from the selection cassette into the inversion cassette (IV-Neo N3) and the 3' end of the MA (iNeo N2). Primer JENS LOX1 was used to sequencing confirm the distal LoxP insertion. Primers mCherry SQ1-2 and JENS SQ2 were used to confirm the remaining sequence of the inversion cassette.

### Targeting Vector For Il1rl2 cKO and mCherry Expression

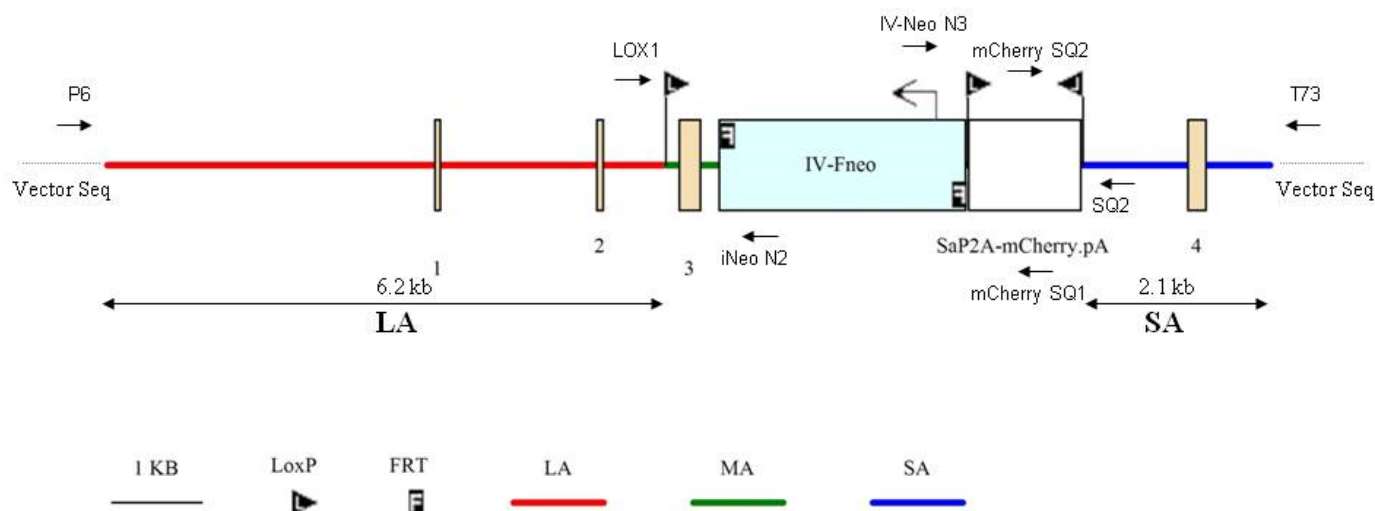

### Primers used for sequencing:

|                     |                                        |     |
|---------------------|----------------------------------------|-----|
| Primer P6:          | 5' - GAG TGC ACC ATA TGG ACA TAT TGT C | -3' |
| Primer T73:         | 5' - TAA TGC AGG TTA ACC TGG CTT ATC G | -3' |
| Primer iNeo N2:     | 5' - AGT ATG GCT TTC CTT CCC GAT GG    | -3' |
| Primer IVNeo N3:    | 5' - TCT AAG GCC GAG TCT TAT GAG CAG   | -3' |
| Primer JENS LOX1:   | 5' - AGG GAA GCT GTC TTT AGA ACC AAG C | -3' |
| Primer JENS SQ2:    | 5' - CAT TAC CTC TGG CAC ATG GAT TC    | -3' |
| Primer mCherry SQ1: | 5' - AGA CCG CCA AGC TGA AGG TGA C     | -3' |

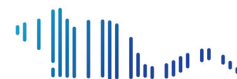

Primer mCherry SQ2:      5'- AGT TCA TCA CGC GCT CCC ACT TG      -3'

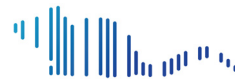

### **Backbone Vector Information**

iTL cloning vector (~2.45 kb) derived from pSP72 (Promega) contains an ampicillin selection cassette for retransformation of the construct prior to electroporation. A FRT flanked Neomycin cassette was inserted into the gene as described in the project schematic. The targeting construct can be linearized with NotI prior to the electroporation of ES cells.

The total size of the targeting construct (including vector backbone and a DT cassette) is ~ 16.9kb.

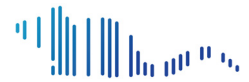

## 2. Sequence Data Analysis

### Sequencing Data from Targeting Construct

#### P6 primer sequencing data aligned with targeted allele sequence

|       |       |                                                               |       |
|-------|-------|---------------------------------------------------------------|-------|
| Query | 10449 | AGC-ACAAACCTTTGTCCATGCTGCTCTACTTGAAGAATGCTCTGTAAGTTGCTATTAAG  | 10507 |
|       |       |                                                               |       |
| Sbjct | 130   | AGCTACAAACCTTTGTCCATGCTGCTCTACTTGAAGAATGCTCTGTAAGTTGCTATTAAG  | 189   |
| Query | 10508 | GCTGCCAAATGGATAGCTTTTCTGTTTCTCTTGGCCCTCTGGATTTTCTTTCCCCTAGTT  | 10567 |
|       |       |                                                               |       |
| Sbjct | 190   | GCTGCCAAATGGATAGCTTTTCTGTTTCTCTTGGCCCTCTGGATTTTCTTTCCCCTAGTT  | 249   |
| Query | 10568 | TTTAGATAGGCAGAACCAAGCCACCCTTTCCAAAGTCACTTGCTCCTCTCCCTGATAGTT  | 10627 |
|       |       |                                                               |       |
| Sbjct | 250   | TTTAGATAGGCAGAACCAAGCCACCCTTTCCAAAGTCACTTGCTCCTCTCCCTGATAGTT  | 309   |
| Query | 10628 | TGCTTGGTGTGGTTACAGAAGGACAGTAGCTCTTCCGGTTCTTGGCTGACTACATTCCAC  | 10687 |
|       |       |                                                               |       |
| Sbjct | 310   | TGCTTGGTGTGGTTACAGAAGGACAGTAGCTCTTCCGGTTCTTGGCTGACTACATTCCAC  | 369   |
| Query | 10688 | AGAGACTGTGCGGCTCTCTCACACACAGGGTTGCAGTGTGGGCACACACCTAGAAATCA   | 10747 |
|       |       |                                                               |       |
| Sbjct | 370   | AGAGACTGTGCGGCTCTCTCACACACAGGGTTGCAGTGTGGGCACACACCTAGAAATCA   | 429   |
| Query | 10748 | CTGTGAGTGTGAGAGTCAAAACCGATGTCCCTTTGAAATGAATGCTTCTTTATTAGTTAAG | 10807 |
|       |       |                                                               |       |
| Sbjct | 430   | CTGTGAGTGTGAGAGTCAAAACCGATGTCCCTTTGAAATGAATGCTTCTTTATTAGTTAAG | 489   |
| Query | 10808 | TATTAATGTTTAAAGCTTTACTTACAAGTACCTGGGCTATGGGACTGCCTTTGCTCCCG   | 10867 |
|       |       |                                                               |       |
| Sbjct | 490   | TATTAATGTTTAAAGCTTTACTTACAAGTACCTGGGCTATGGGACTGCCTTTGCTCCCG   | 549   |
| Query | 10868 | ATTCATGCCAACCTTCATTAATGGCCAAGTGTGCTGAGACAGGAGCCAGGTCCTCTAACT  | 10927 |
|       |       |                                                               |       |
| Sbjct | 550   | ATTCATGCCAACCTTCATTAATGGCCAAGTGTGCTGAGACAGGAGCCAGGTCCTCTAACT  | 609   |
| Query | 10928 | CCCAGATAACTAGTTACCCTTTCTAACCATCTTCTTTCTGCAGATGACATTGGAGAGGAA  | 10987 |
|       |       |                                                               |       |
| Sbjct | 610   | CCCAGATAACTAGTTACCCTTTCTAACCATCTTCTTTCTGCAGATGACATTGGAGAGGAA  | 669   |
| Query | 10988 | TAAATGCAAGTCCTTTTATTTTGTATAAGGACATATGTCCGAGTTAAGTTTGAAAAGGTA  | 11047 |
|       |       |                                                               |       |
| Sbjct | 670   | TAAATGCAAGTCCTTTTATTTTGTATAAGGACATATGTCCGAGTTAAGTTTGAAAAGGTA  | 729   |
| Query | 11048 | GCCCCAGGAGCATCAAGAGTAGATAAGGATTTAGGGTGTAAATGTACAAGCAGAATGAGT  | 11107 |
|       |       |                                                               |       |
| Sbjct | 730   | GCCCCAGGAGCATCAAGAGTAGATAAGGATTTAGGGTGTAAATGTACAAGCAGAATGAGT  | 789   |
| Query | 11108 | TGCAGCACTGGTTGGCACCAGAACTTGCCAGCAGCTCCAGGGCCCTGTGACTAGGAGCCA  | 11167 |
|       |       |                                                               |       |
| Sbjct | 790   | TGCAGCACTGGTTGGCACCAGAACTTGCCAGCAGCTCCAGGGCCCTGTGACTAGGAGCCA  | 849   |
| Query | 11168 | GCACCACTTGGAAGTGTGACGGGCAGATGGCTTCCTGCTTGCCAGGCTGGAAAGACCAGG  | 11227 |
|       |       |                                                               |       |
| Sbjct | 850   | GCACCACTTGGAAGTGTGACGGGCAGATGGCTTCCTGCTTGCCAGGCTGGAAAGACCAGG  | 908   |

**Note: shaded sequence is from backbone vector**

Query: Respective Targeted Allele Sequence

Sbjct: Sequencing data from Targeting Vector





**JENS LOX1 primer sequencing data aligned with targeted allele sequence: genomic sequence is in plain text; 5' Loxp cassette is highlighted with LoxP site underlined**

|       |       |                                                                       |       |
|-------|-------|-----------------------------------------------------------------------|-------|
| Query | 16421 | TCTGACTGCAAGTATAGGCAGGAAAACGACCAGGTTGGTTCTATGTTGAGACAGAGACTA          | 16480 |
|       |       |                                                                       |       |
| Sbjct | 13    | TCTGNCTGC-AGTATAGGCAGG-AAACGACCAGGTTGGTTCTATGTTGAGACAGAGACTA          | 70    |
| Query | 16481 | AGGGCAGAAGAGTGAACAGATACAGACACAGGGGCCGTGGTTCTGTGGAGGGTCCTGGGG          | 16540 |
|       |       |                                                                       |       |
| Sbjct | 71    | AGGGCAGAAGAGTGAACAGATACAGACACAGGGGCCGTGGTTCTGTGGAGGGTCCTGGGG          | 130   |
| Query | 16541 | AAGCCTTGTCCTCACTATACATTGAAGGCTTAGCATTATGCTTCTAAATGACTGGGCT            | 16600 |
|       |       |                                                                       |       |
| Sbjct | 131   | AAGCCTTGTCCTCACTATACATTGAAGGCTTAGCATTATGCTTCTAAATGACTGGGCT            | 190   |
| Query | 16601 | AGTTTGGGGAAACACCCCAAATAA <u>CTTCGTATAATGTATGCTATACGAAGTTATGT</u> ACAA | 16660 |
|       |       |                                                                       |       |
| Sbjct | 191   | AGTTTGGGGAAACACCCCAAATAA <u>CTTCGTATAATGTATGCTATACGAAGTTATGT</u> ACAA | 250   |
| Query | 16661 | ACTCCTAAATGCAATTTACATTGACCAGAGCAAAATATTCCTAAAAAGAATAATGACT            | 16720 |
|       |       |                                                                       |       |
| Sbjct | 251   | ACTCCTAAATGCAATTTACATTGACCAGAGCAAAATATTCCTAAAAAGAATAATGACT            | 310   |
| Query | 16721 | CCAGTTTCTGCCttttattttattttattttattttattttattttattgttttC               | 16780 |
|       |       |                                                                       |       |
| Sbjct | 311   | CCAGTTTCTGCCTTATTTTATTTTATTTTATTTTATTTTATTTTATTTTATTGTTTC             | 370   |
| Query | 16781 | CTTTCCTTCCCCAGATACGTGTGAGGACATTTTATGCACAATGTGATAATTCAGAGGG            | 16840 |
|       |       |                                                                       |       |
| Sbjct | 371   | CTTTCCTTCCCCAGATACGTGTGAGGACATTTTATGCACAATGTGATAATTCAGAGGG            | 430   |
| Query | 16841 | CCAGCCTTTTCCTTTCAACTGCACATACCCGCCAGAAACAAACGGGGCAGTAAATCTGAC          | 16900 |
|       |       |                                                                       |       |
| Sbjct | 431   | CCAGCCTTTTCCTTTCAACTGCACATACCCGCCAGAAACAAACGGGGCAGTAAATCTGAC          | 490   |
| Query | 16901 | ATGGTACAAAACACCTAGCAAAAGCCCAGTATCTAACAACAGACACCTTAGAGTTCACCA          | 16960 |
|       |       |                                                                       |       |
| Sbjct | 491   | ATGGTACAAAACACCTAGCAAAAGCCCAGTATCTAACAACAGACACCTTAGAGTTCACCA          | 550   |
| Query | 16961 | GGACCAGACCTGGATCTTGTTTCTTCCATTGACACTGGAGGACTCCGGTATCTATCAGTG          | 17020 |
|       |       |                                                                       |       |
| Sbjct | 551   | GGACCAGACCTGGATCTTGTTTCTTCCATTGACACTGGAGGACTCCGGTATCTATCAGTG          | 610   |
| Query | 17021 | TGTTATAAGGTAAGTCCTTCATTTAAAGTGGAATAA-TTCCCAAGTCTCCCTCTCCATT           | 17079 |
|       |       |                                                                       |       |
| Sbjct | 611   | TGNTATAANGNAAGTCCTTCATTTAAAGTGGNACTAATTTCCCAAGTCTCCCTCTCCATT          | 670   |

Query: Respective Targeted Allele Sequence  
Sbjct: Sequencing data from Targeting Vector



**iNeoN2 primer sequencing data aligned with targeted allele sequence. genomic sequence is in plain text; Neo sequence is in red text with FRT site underlined;**

```

Query 16762  attttatatttattgttttCCTTTCCTTCCCCAGATACGTGTGAGGACATTTTATGCACA 16821
            |||
Sbjct 661    ATTTTATTTTA-NGTTTTCCTTTCNTTCCCCAGATACGTGTGAGGACATTTTATGCACA 603

Query 16822  ATGTGATAATTTTCAGAGGGCCAGCCTTTTCCTTCAACTGCACATACCCGCCAGAAACAA 16881
            |||
Sbjct 602    ATGTGATAATTTTCAGAGGGCCAGCCTTTTCCTTCAACTGCACATACCCGCCAGAAACAA 543

Query 16882  ACGGGGCAGTAAATCTGACATGGTACAAAACACCTAGCAAAAGCCCAGTATCTAACAACA 16941
            |||
Sbjct 542    ACGGGGCAGTAAATCTGACATGGTACAAAACACCTAGCAAAAGCCCAGTATCTAACAACA 483

Query 16942  GACACCTTAGAGTTCACCAGGACCAGACCTGGATCTTGTTTCTTCCATTGACACTGGAGG 17001
            |||
Sbjct 482    GACACCTTAGAGTTCACCAGGACCAGACCTGGATCTTGTTTCTTCCATTGACACTGGAGG 423

Query 17002  ACTCCGGTATCTATCAGTGTGTTATAAGGTAAGTCCTTCATTTAAAGTGGAACATAATTCC 17061
            |||
Sbjct 422    ACTCCGGTATCTATCAGTGTGTTATAAGGTAAGTCCTTCATTTAAAGTGGAACATAATTCC 363

Query 17062  CAAGTCTCCCTCTCCATTTCTAAAGACAACCTTTTAAAGAAAATGGGTATTATTGGCCTTT 17121
            |||
Sbjct 362    CAAGTCTCCCTCTCCATTTCTAAAGACAACCTTTTAAAGAAAATGGGTATTATTGGCCTTT 303

Query 17122  ATTTTGAGACTTGTTATATAGCCTAGACAAGTTTCCAAGTCTTCTTAAAGTACTGAAA 17181
            |||
Sbjct 302    ATTTTGAGACTTGTTATATAGCCTAGACAAGTTTCCAAGTCTTCTTAAAGTACTGAAA 243

Query 17182  GGACAGGTGTGAACCACCACAACCAGCCGCTACACACCACAACCAGCTGCTACACAAATG 17241
            |||
Sbjct 242    GGACAGGTGTGAACCACCACAACCAGCCGCTACACACCACAACCAGCTGCTACACAAATG 183

Query 17242  CGTACGTTCGTGGGATTGTGTCCGTGTCGCGAAGTTCCTATACTTTCTAGAGAATAGGAA 17301
            |||
Sbjct 182    CGTACGTTCGTGGGATTGTGTCCGTGTCGCGAAGTTCCTATACTTTCTAGAGAATAGGAA 123

Query 17302  CTTCCCGCGGTTGTAAGTTCTCCAGATCTAGAGTAAGACAGAAGTCTGGAAGACATGGGA 17361
            |||
Sbjct 122    CTTCCCGCGGTTGTAAGTTCTCCAGATCTAGAGTAAGACAGAAGTCTGGAAGACATGGGA 63

Query 17362  GTGAGTTGTGAGGTGATCCAGGAAGAGACCTTCTGCAATCCAGTGACCA 17410
            |||
Sbjct 62    GTGAGTTGTGAGGTGATCCAGGAAGAGACNT-CTGCA-TCCAGNGANCA 16

```

Query: Respective Targeted Allele Sequence  
 Sbjct: Sequencing data from Targeting Vector

IV-NeoN3 primer sequencing data aligned with targeted allele sequence: Neo sequence is in **red text** with FRT site underlined; Lox71 site highlighted in **yellow**; Sa.**P2A**-mCherry.pA inversion cassette is in **blue text**.

|       |       |                                                               |       |
|-------|-------|---------------------------------------------------------------|-------|
| Query | 19781 | GGACGCTCGCTGCGCCCTTCGTCTGACGTGGCAGCGCTCGCCGTGAGGAGGGGGGCGCCC  | 19840 |
| Sbjct | 27    | GGACGCTCGCTGCGCCCTTCGTCTGACGTGGCAGCGCTCGCCGTGAGGAGGGGGGCGCCC  | 86    |
| Query | 19841 | GCGGGAGGCGCCAAAACCCGGCGCGGAGGCCGCATGCTCCAGACTGCCTTGGGAAAAGCG  | 19900 |
| Sbjct | 87    | GCGGGAGGCGCCAAAACCCGGCGCGGAGGCCGCATGCTCCAGACTGCCTTGGGAAAAGCG  | 146   |
| Query | 19901 | CCTCCCCTACCCGGTAGAATGAAGTTCCTATACTTTCTAGAGAATAGGAACCTCGTTGGT  | 19960 |
| Sbjct | 147   | CCTCCCCTACCCGGTAGAATGAAGTTCCTATACTTTCTAGAGAATAGGAACCTCGTTGGT  | 206   |
| Query | 19961 | ACCGTACGCAATTGTACCGTTCGTATAATGTATGCTATACGAAGTTATCTAGCGCGCCTC  | 20020 |
| Sbjct | 207   | ACCGTACGCAATTGTACCGTTCGTATAATGTATGCTATACGAAGTTATCTAGCGCGCCTC  | 266   |
| Query | 20021 | GACTCTAGCCCCCTCGACTAGAGGATCGAGCCCCAGCTGGTTCCTTCCGCCTCAGAAGCC  | 20080 |
| Sbjct | 267   | GACTCTAGCCCCCTCGACTAGAGGATCGAGCCCCAGCTGGTTCCTTCCGCCTCAGAAGCC  | 326   |
| Query | 20081 | ATAGAGCCACCGCATCCCCAGCATGCCTGCTATTGTCTTCCCAATCCTCCCCCTTGCTG   | 20140 |
| Sbjct | 327   | ATAGAGCCACCGCATCCCCAGCATGCCTGCTATTGTCTTCCCAATCCTCCCCCTTGCTG   | 386   |
| Query | 20141 | TCCTGccccaccccacccccAGAAATAGAATGACACCTACTCAGACAATGCGATGCAATT  | 20200 |
| Sbjct | 387   | TCCTGCCCCACCCACCCCCAGAAATAGAATGACACCTACTCAGACAATGCGATGCAATT   | 446   |
| Query | 20201 | TCCTCATTTTATTAGGAAAGGACAGTGGGAGTGGCACCTTCCAGGGTCAAGGAAGGCACG  | 20260 |
| Sbjct | 447   | TCCTCATTTTATTAGGAAAGGACAGTGGGAGTGGCACCTTCCAGGGTCAAGGAAGGCACG  | 506   |
| Query | 20261 | GGGGAGGGGCAAAACAACAGATGGCTGGCAACTAGAAGGCACAGTCGAGGCTGATCAGCGA | 20320 |
| Sbjct | 507   | GGGGAGGGGCAAAACAACAGATGGCTGGCAACTAGAAGGCACAGTCGAGGCTGATCAGCGA | 566   |
| Query | 20321 | GCTCACTTGTACAGCTCGTCCATGCCGCCGGTGGAGTGGCGGCCCT-CGGCGCGT-TCGT  | 20378 |
| Sbjct | 567   | GCTCANTNGTANNGCTCGTACATGNGGTGGTGGAGTGGCGGCCCTACGGCGCGTNTCGT   | 626   |

Query: Respective Targeted Allele Sequence  
Sbjct: Sequencing data from Targeting Vector





mCherry SQ1 primer sequencing data aligned with targeted allele sequence: Sa. **P2A-mCherry**. pA inversion cassette is in **blue** text.

|       |       |                                                               |       |
|-------|-------|---------------------------------------------------------------|-------|
| Query | 20124 | AATCCTCCCCCTTGCTGTCCTGccccacccccccccccAGAATAGAATGACACCTACTCA  | 20183 |
|       |       |                                                               |       |
| Sbjct | 732   | AATCCTCCCCCTTGCTGTCNTGCCCCACCCACCCCCAGAAATAGAATGACACCTACTCA   | 673   |
| Query | 20184 | GACAATGCGATGCAATTTCTCTCATTTTATTAGGAAAGGACAGTGGGAGTGGCACCTTCCA | 20243 |
|       |       |                                                               |       |
| Sbjct | 672   | GACAATGCGATGCAATTTCTCTCATTTTATTAGGAAAGGACAGTGGGAGTGGCACCTTCCA | 613   |
| Query | 20244 | GGGTCAAGGAAGGCACGGGGGAGGGGCAAACAACAGATGGCTGGCAACTAGAAAGGCACAG | 20303 |
|       |       |                                                               |       |
| Sbjct | 612   | GGGTCAAGGAAGGCACGGGGGAGGGGCAAACAACAGATGGCTGGCAACTAGAAAGGCACAG | 553   |
| Query | 20304 | TCGAGGCTGATCAGCGAGCTCACTTGTACAGCTCGTCCATGCCGCCGGTGGAGTGGCGGC  | 20363 |
|       |       |                                                               |       |
| Sbjct | 552   | TCGAGGCTGATCAGCGAGCTCACTTGTACAGCTCGTCCATGCCGCCGGTGGAGTGGCGGC  | 493   |
| Query | 20364 | CCTCGGCGCGTTTCGTACTGTTCCACGATGGTGTAGTCCTCGTTGTGGGAGGTGATGTCCA | 20423 |
|       |       |                                                               |       |
| Sbjct | 492   | CCTCGGCGCGTTTCGTACTGTTCCACGATGGTGTAGTCCTCGTTGTGGGAGGTGATGTCCA | 433   |
| Query | 20424 | ACTTGATGTTGACGTTGTAGGCGCCGGGCAGCTGCACGGGCTTCTTGCCCTTGTAGGTGG  | 20483 |
|       |       |                                                               |       |
| Sbjct | 432   | ACTTGATGTTGACGTTGTAGGCGCCGGGCAGCTGCACGGGCTTCTTGCCCTTGTAGGTGG  | 373   |
| Query | 20484 | TCTTGACCTCAGCGTCGTAGTGGCCGCCGTCTTCAGCTTCAGCCTCTGCTTGATCTCGC   | 20543 |
|       |       |                                                               |       |
| Sbjct | 372   | TCTTGACCTCAGCGTCGTAGTGGCCGCCGTCTTCAGCTTCAGCCTCTGCTTGATCTCGC   | 313   |
| Query | 20544 | CCTTCAGGGCGCCGTCTCGGGGTACATCCGCTCGGAGGAGGCCTCCCAGCCCATGGTCT   | 20603 |
|       |       |                                                               |       |
| Sbjct | 312   | CCTTCAGGGCGCCGTCTCGGGGTACATCCGCTCGGAGGAGGCCTCCCAGCCCATGGTCT   | 253   |
| Query | 20604 | TCTTCTGCATTACGGGGCCGTTCGAGGGGAAGTTGGTGCCGCGCAGCTTCACCTTGTAGA  | 20663 |
|       |       |                                                               |       |
| Sbjct | 252   | TCTTCTGCATTACGGGGCCGTTCGAGGGGAAGTTGGTGCCGCGCAGCTTCACCTTGTAGA  | 193   |
| Query | 20664 | TGAACTCGCCGTCCTGCAGGGAGGAGTCTGGGTACCGGTACACGCGCCGCTCCTCGA     | 20723 |
|       |       |                                                               |       |
| Sbjct | 192   | TGAACTCGCCGTCCTGCAGGGAGGAGTCTGGGTACCGGTACACGCGCCGCTCCTCGA     | 133   |
| Query | 20724 | AGTTCATCAGCGCTCCCACTTGAAGCCCTCGGGGAAGGACAGCTTCAAGTAGTCGGGGA   | 20783 |
|       |       |                                                               |       |
| Sbjct | 132   | AGTTCATCAGCGCTCCCACTTGAAGCCCTCGGGGAAGGACAGCTTCAAGTAGTCGGGGA   | 73    |
| Query | 20784 | TGTCGGCGGGGTGCTTCACGTAGGCCTTGGAGCCGTACATGAAGTGAAGGGACAGG      | 20839 |
|       |       |                                                               |       |
| Sbjct | 72    | TGTCGGCGGGGTGCTTCACGTAGGCCTTGGAGCCGTACATGAAGTGAAGGG-ACAGG     | 18    |

Query: Respective Targeted Allele Sequence  
Sbjct: Sequencing data from Targeting Vector

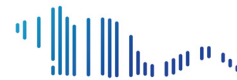

mCherry SQ2 primer sequencing data aligned with targeted allele sequence: Sa.P2A-mCherry.pA inversion cassette is in blue text; Lox66 cassette sequence is highlighted in yellow with Lox66 site underlined; genomic sequence is in plain text.

|       |       |                                                                |       |
|-------|-------|----------------------------------------------------------------|-------|
| Query | 20787 | CGGCGGGGTGCTTCACGTAGGCCTTGGAGCCGTACATGAACTGAGGGGACAGGATGTCCC   | 20846 |
| Sbjct | 19    | CGGCGGGGTGCTTCACGTAGGCCTTGGAGCCGTACATGAACTGAGGGGACAGGATGTCCC   | 78    |
| Query | 20847 | AGGCGAAGGGCAGGGGGCCACCCTTGGTCACCTTCAGCTTGGCGGTCTGGGTGCCCTCGT   | 20906 |
| Sbjct | 79    | AGGCGAAGGGCAGGGGGCCACCCTTGGTCACCTTCAGCTTGGCGGTCTGGGTGCCCTCGT   | 138   |
| Query | 20907 | AGGGGCGGCCCTCGCCCTCGCCCTCGATCTCGAACTCGTGGCCGTTTACGGAGCCCTCCA   | 20966 |
| Sbjct | 139   | AGGGGCGGCCCTCGCCCTCGCCCTCGATCTCGAACTCGTGGCCGTTTACGGAGCCCTCCA   | 198   |
| Query | 20967 | TGTGCACCTTGAAGCGCATGAACTCCTTGATGATGGCCATGTTATCCTCCTCGCCCTTGC   | 21026 |
| Sbjct | 199   | TGTGCACCTTGAAGCGCATGAACTCCTTGATGATGGCCATGTTATCCTCCTCGCCCTTGC   | 258   |
| Query | 21027 | TCACCATAGGTCCAGGGTTCTCCTCCACGTCTCCAGCCTGCTTCAGCAGGCTGAAGTTAG   | 21086 |
| Sbjct | 259   | TCACCATAGGTCCAGGGTTCTCCTCCACGTCTCCAGCCTGCTTCAGCAGGCTGAAGTTAG   | 318   |
| Query | 21087 | TAGCTCCGCTTCCGTCCTCACACGTATCTGGGGAAGGAAAGGaaaacaataaaaataaaaat | 21146 |
| Sbjct | 319   | TAGCTCCGCTTCCGTCCTCACACGTATCTGGGGAAGGAAAGGAAACAATAAAATAAAAT    | 378   |
| Query | 21147 | aaaataaaaataaaaataaaaataaaaAGGCAGAAAACCTGGAGTCATTATTTCTTTTAGG  | 21206 |
| Sbjct | 379   | AAAATAAAATAAAATAAAATAAAATAAAGGCAGAAAACCTGGAGTCATTATTTCTTTTAGG  | 438   |
| Query | 21207 | GAATATTTTGTCTCTGGTCAATGTGAAATTGCATTTAGGAGTTGTACCGTTCGTATAGCA   | 21266 |
| Sbjct | 439   | GAATATTTTGTCTCTGGTCAATGTGAAATTGCATTTAGGAGTTGTACCGTTCGTATAGCA   | 498   |
| Query | 21267 | TACATTATACGAAGTTATACGCGTAGGGCAGCCTTGAAGTGGCAGGAGATGACGTCCAGT   | 21326 |
| Sbjct | 499   | TACATTATACGAAGTTATACGCGTAGGGCAGCCTTGAAGTGGCAGGAGATGACGTCCAGT   | 558   |
| Query | 21327 | GAGCACTTTTGAAAGCAGAACAGCTTTAGAAATAACTTTTGGAGCACAGATTGCACCATC   | 21386 |
| Sbjct | 559   | GAGCACTTTTGAAAGCAGAACAGCTTTAGAAATAACTTTTGGAGCACAGATTGCACCATC   | 618   |
| Query | 21387 | TTCTTCATTGAAGTTTGTAGCCAGACCAGCTTACAGAGAGAGGTGTTTATCAATGAGAT    | 21446 |
| Sbjct | 619   | TTCTTCATTGAAGTTTGTAGCCAGACCAGCTTACAGAGAGAGGTGTTTATCAATGAGAT    | 678   |
| Query | 21447 | TGCTGCCATTTCCGAAGATGGCTAATGGTTTTGGAAAACCTGGCTGATCCAGACCCAA-CT  | 21505 |
| Sbjct | 679   | TGCTGCCATTTCCGAAGATGGCTAATGGTTTTGGAAAACCTGGCTGATCCAGACCCAACT   | 738   |

Query: Respective Targeted Allele Sequence  
Sbjct: Sequencing data from Targeting Vector



JENS SQ2 primer sequencing data aligned with targeted allele sequence: Sa.**P2A**-mCherry.pA inversion cassette is in **blue** text; Lox66 cassette sequence is highlighted in **yellow** with Lox66 site **underlined**; genomic sequence is in plain text.

|       |       |                                                                        |       |
|-------|-------|------------------------------------------------------------------------|-------|
| Query | 20806 | GGCCTTGGAGCC-GTACATGAACTGAGGGG-ACAGGATGTCCAGGCCAAGGGCAGGGG             | 20863 |
| Sbjct | 775   | GGCCTTGGAGCCCGTACATGAACTGAGGGGACAGGATGTCCAGGCCAAGGGCAGGGG              | 716   |
| Query | 20864 | CCACCCTTGGTCACCTTCAGCTTGGCGGTCTGGGTGCCCTCGTAGGGGCGGCCCTCGCCC           | 20923 |
| Sbjct | 715   | CCACCCTTGGTCACCTTCAGCTTGGCGGTCTGGGTGCCCTCGTAGGGGCGGCCCTCGCCC           | 658   |
| Query | 20924 | TCGCCCTCGATCTCGAACTCGTGGCCGTTACGGAGCCCTCCATGTGCACCTTGAAGCGC            | 20983 |
| Sbjct | 657   | TCGCCCTCGATCTCGAACTCGTGGCCGTTACGGAGCCCTCCATGTGCACCTTGAAGCGC            | 598   |
| Query | 20984 | ATGAACTCCTTGATGATGGCCATGTTATCCTCCTCGCCCTTGCTCACC <u>CAT</u> AGGTCCAGGG | 21043 |
| Sbjct | 597   | ATGAACTCCTTGATGATGGCCATGTTATCCTCCTCGCCCTTGCTCACCATAGGTCCAGGG           | 538   |
| Query | 21044 | TTCTCTCCACGCTTCCAGCCTGCTTCAGCAGGCTGAAGTTAGTAGCTCCGCTTCGTCC             | 21103 |
| Sbjct | 537   | TTCTCTCCACGCTTCCAGCCTGCTTCAGCAGGCTGAAGTTAGTAGCTCCGCTTCGTCC             | 478   |
| Query | 21104 | TCACACGTATCTGGGAAGGAAAGGaaaacaataaaaataaaaataaaaataaaaataa             | 21163 |
| Sbjct | 477   | TCACACGTATCTGGGAAGGAAAGGAAAACAATAAAATAAAATAAAATAAAATAAAATAA            | 418   |
| Query | 21164 | aaaaataaaaGGCAGAAAACCTGGAGTCATTATTCTTTTAGGGAATATTTTGCTCTGGT            | 21223 |
| Sbjct | 417   | AATAAAATAAAGGCAGAAAACCTGGAGTCATTATTCTTTTAGGGAATATTTTGCTCTGGT           | 358   |
| Query | 21224 | CAATGTGAAATTGCATTTAGGAGTTTG <u>TACCGTTCGTATAGCATACATTATACGAAGTTA</u>   | 21283 |
| Sbjct | 357   | CAATGTGAAATTGCATTTAGGAGTTTGACCGTTCGTATAGCATACATTATACGAAGTTA            | 298   |
| Query | 21284 | <u>TACGCGT</u> AGGGCAGCCTTGAAGTGGCAGGAGATGACGTCCAGTGAGCACTTTTGAAAGCA   | 21343 |
| Sbjct | 297   | TACGCGTAGGGCAGCCTTGAAGTGGCAGGAGATGACGTCCAGTGAGCACTTTTGAAAGCA           | 238   |
| Query | 21344 | GAACAGCTTTAGAAATAACTTTTGAGACACAGATTGCACCATCTTCTTCATTGAAGTTT            | 21403 |
| Sbjct | 237   | GAACAGCTTTAGAAATAACTTTTGAGACACAGATTGCACCATCTTCTTCATTGAAGTTT            | 178   |
| Query | 21404 | AGCCAGACCAGCTTACAGAGAGAGGTGTTTTATCAATGAGATTGCTGCCATTTCCGAAG            | 21463 |
| Sbjct | 177   | AGCCAGACCAGCTTACAGAGAGAGGTGTTTTATCAATGAGATTGCTGCCATTTCCGAAG            | 118   |
| Query | 21464 | ATGGCTAATGGTTTTTGAAAACCTGGCTGATCCAGACCCAACTAGATCATTCAAACACATC          | 21523 |
| Sbjct | 117   | ATGGCTAATGGTTTTTGAAAACCTGGCTGATCCAGACCCAACTAGATCATTCAAACACATC          | 58    |
| Query | 21524 | TGATAAGGAATCAGCTTAAGGCAGACATTTGAAAGCTAGCAAATCTGGG                      | 21572 |
| Sbjct | 57    | TGATAAGGAATCAGCTTAAGGCAGACATT-GAAAGCTAGNAAANCTGGG                      | 10    |

Query: Respective Targeted Allele Sequence  
Sbjct: Sequencing data from Targeting Vector

**T73 primer sequencing data aligned with respective targeted allele sequence**

```
Query 23100 ACA-CAAATTCCTG-CCTAAGAAAGACTCCTC-AGGGC-TATCTGTGTTT-TGTTACTCA 23154
          ||| ||||| ||||| ||||| ||||| ||||| ||||| ||||| ||||| ||||| ||||| |||||
Sbjct 298 ACACCAAATTCCTTGCCCTAAGAAAGNNTCCTCCAGGGCTTATCTGNGTTCTTGTTACTCA 239

Query 23155 -CCAAACCTTGTCCTCCAGCCATGGCTGCTGCTATCAACTACTGCCACCCTCCTCCCGCCA 23213
          ||||| ||||| ||||| ||||| ||||| ||||| ||||| ||||| ||||| ||||| ||||| |||||
Sbjct 238 CCAAACCTTGTCCTCCAGCCATGGCTGCTGCTATCAACTACTGCCACCCTCCTCCCGCCA 179

Query 23214 CTCCCCACCTCAGTATTTGAAAACCTCAGTTGTATCTTAGCCTCTTCTCTTTGAAATGTGA 23273
          ||||| ||||| ||||| ||||| ||||| ||||| ||||| ||||| ||||| ||||| ||||| |||||
Sbjct 178 CTCCCCACCTCAGTATTTGAAAACCTCAGTTGTATCTTAGCCTCTTCTCTTTGAAATGTGA 119

Query 23274 ACAGTTTCCCATGCTCCTCTTTCTTCATCCTGTGTTTGCTTTAACCTGGCCTTCTCTCCT 23333
          ||||| ||||| ||||| ||||| ||||| ||||| ||||| ||||| ||||| ||||| ||||| |||||
Sbjct 118 ACAGTTTCCCATGCTCCTCTTTCTTCATCCTGTGTTTGCTTTAACCTGGCCTTCTCTCCT 59

Query 23334 CAAGGCTCAGCTAGACACT 23352
          ||||| ||||| ||||| ||||| ||||| ||||| ||||| ||||| ||||| ||||| ||||| |||||
Sbjct 58 CAAGGCTCAGCTAGACACT 40
```

Query: Respective Targeted Allele Sequence

Sbjct: Sequencing data from Targeting Vector

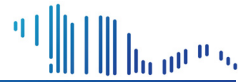

## Backbone Vector Sequence

3' end of BAC subclone joins here

catCGATGATGGGCCACATTGG CCTCGACGATATCGCGATCGCCGATAAGCCAGGTTAACCTGCATTAACGCGCCGTCGACGCGGCGCG  
TTTGCGTATTGGGCGCTCTTCCGCTTCCTCGCTCACTGACTCGCTGCGCTCGGTTCGGCTGCGGCGAGCGGTATCAGCTCACTCAA  
AGGCGGTAATACGGTTATCCACAGAATCAGGGGATAACGCAGGAAAGAACATGTGAGCAAAAGGCCAGCAAAAGGCCAGGAACCGTAAA  
AAGGCCGCGTTGCTGGCGTTTTTCCATAGGCTCCGCCCCCTGACGAGCATCACAAAAATCGACGCTCAAGTCAGAGGTGGCGAAACCC  
GACAGGACTATAAAGATACCAGGCGTTTTCCCCCTGGAAGCTCCCTCGTGCCTCTCCTGTTCCGACCCGTCCGCTTACCGGATACCTGT  
CCGCTTTCTCCCTTCGGGAAGCGTGGCGCTTTCTCATAGCTCAGCTGTAGGTATCTCAGTTCGGTGTAGGTGCTTCGCTCCAAGCTG  
GGCTGTGTGCACGAACCCCCCGTTCAGCCCGACCGCTGCGCCTTATCCGGTAACCTATCGTCTTGAGTCCAACCCGGTAAGACACGACTT  
ATCGCCACTGGCAGCAGCCACTGGTAACAGGATTAGCAGAGCGAGGTATGTAGGCGGTGCTACAGAGTTCTTGAAGTGGTGGCCTAACT  
ACGGCTACACTAGAGAAGACAGTATTTGGTATCTGCGCTCTGCTGAAGCCAGTTACCTTCGGAAAAAGAGTTGGTAGCTCTTGATCCGGC  
AAACAAACCACCGCTGGTAGCGGTGGTTTTTTTTGTTTGCAAGCAGCAGATTACGCGCAGAAAAAAGGATCTCAAGAAGATCCTTTGAT  
CTTTTCTACGGGGTCTGACGCTCAGTGGAAACGAAAACTCACGTTAAGGGATTTTGGTTCATGAGATTATCAAAAAAGGATCTTCACCTAGA  
TCCTTTTAAATTAATAATGAAGTTTTAAATCAATCTAAAGTATATATGAGTAACTTGGTCTGACAGTTACCAATGCTTAATCAGTGAG  
GCACCTATCTCAGCGATCTGTCTATTTTCGTTTCATCCATAGTTGCCTGACTCCCCGTCGTGTAGATAACTACGATACGGGAGGGCTTACC  
ATCTGGCCCCAGTGCTGCAATGATACCGCGAGACCCACGCTCACCGGCTCCAGATTTATCAGCAATAAACCCAGCCAGCCGGAAGGGCCG  
AGCGCAGAAGTGGTCTGCAACTTTATCCGCTCCATCCAGTCTATTAATTGTTGCCGGAAGCTAGAGTAAGTAGTTCCGCCAGTTAATA  
GTTTGCGCAACGTTGTTGCCATTGCTACAGGCATCGTGGTGTACGCTCGTCTGTTGGTATGGCTTCATTCAGCTCCGGTTCCCAACGA  
TCAAGGCGAGTTACATGATCCCCCATGTTGTGCAAAAAAGCGGTTAGCTCCTTCGGTCCCTCCGATCGTTGTCAGAAGTAAGTTGGCCGC  
AGTGTATCACTCATGGTTATGGCAGCACTGCATAATTCTCTTACTGTTCATGCCATCCGTAAGATGCTTTTCTGTGACTGGTGGTACT  
CAACCAAGTCATTCTGAGAATAGTGTATGCGGCGACCGAGTTGCTCTTGCCCGGCGTCAATACGGGATAAATACCGCGCCACATAGCAGA  
ACTTTAAAAGTGCTCATCATTTGAAAAACGTTCTTCGGGGCGAAAACTCTCAAGGATCTTACCGCTGTTGAGATCCAGTTCGATGTAACC  
CACTCGTGACCCAACTGATCTTCAGCATCTTTTACTTTTACCAGCGTTTCTGGGTGAGCAAAAACAGGAAGGCAAAATGCCGCAAAAA  
AGGGAATAAGGGCGACACGAAATGTTGAATACTCATACTCTTCTTTTCAATATTATTGAAGCATTATCAGGGTTATTGTCTCATG  
AGCGGATACATATTTGAATGTATTTAGAAAAATAAAACAAATAGGGGTTCCGCGCACATTTCCCCGAAAAGTGCCACCTGACGTCTAAGA  
AACCATTATTATCATGACATTAACCTATAAAAAATAGGCGTATCACGAGGCCCTTTCGTCTCGCGCGTTTCGGTGATGACGGTGAAAACC  
TCTGACACATGCAGCTCCCGGAGACGGTCACAGCTTGTCTGTAAGCGGATGCCGGGAGCAGACAAGCCCGTCAGGGCGCGTCAGCGGGT  
GTTGGCGGGTGTGCGGGCTGGCTTAACATATGCGGCATCAGAGCAGATTGTACTGAGAGTGCACCATATGGACATATTGTGCTTAGAACG  
CGGCTACAATTAATACATAACCTTATGTATCATAACATACGATTTAGGTGACACTATAGAACTCGATGCGGCCCTTCAGGCGCGCCA  
TTTAAATGCGGCCGCACTCAGGATGTCCCTGAAGct

5' end of BAC subclone joins here



### 3. Cassette Sequences

#### FRT flanked IV-UBS-Neo Cassette (3'-5')

FRT sites are ***Bold/Italics***

**ATG** and **STOP** codons are indicated

GTACGTTTCGTGGGATTGTGTCCGTGTGCGC***GAAGTTCCTATACTTTCTAGAGAATAGGAAC******TTCC***CGCGGTTGTAAGTTCTCCAGATCTA  
GAGTAAGACAGAAGTCTGGAAGACATGGGAGTGAGTTGTCAGGTGATCCAGGAAGAGACCTTCTGCAATCCAGTGACCAATTAATTACA  
GCAGAAAGGACCATCGGGAAGGAAAGCCATACTCTCCAGGAACGTCATTAGTCGGGATCTTCAGTTGCTACAAGAAGCAGATGTCAAAC  
GGCCTTCCCCTAACCATGTGAGAAAGTGAGCTTTCACTGGCCCGGGTGTGAAGTGATTCTAATGGAATAAATGGATTTGCTAAGGAATAG  
TTTCCTCAGAAAGAAATCCTGGGAGCAAGTGGGGAAGCTGACTCAGCAAAACAGAGCTGTTTCTTGAGGACGATGCCAATAGCAATCAT  
TTGACCAAACTGAAGTGCCGTCAGGAGGCATGAGGATCTGATATCAGGGAGCTCTCAGACGTCGCTTGGTCGGTCTTTATTTCGAACCC  
CAGAGTCCCGC***TCAG***GAAGAACTCGTCAAGAAGGCGATAGAAGGCGATGCGCTGCGAATCGGGAGCGGCGATACCGTAAAGCACGAGGAA  
GCGGTCAGCCCATTCGCCGCCAAGCTCTTCAGCAATATCACGGGTAGCCAACGCTATGTCTTGATAGCGGTCCGCCACACCCAGCCGGC  
CACAGTCGATGAATCCAGAAAAGCGGCCATTTTCCACCATGATATTTCGGCAAGCAGGCATCGCCATGGGTACAGACGAGATCCTCGCCG  
TCGGGCATGCGCGCCTTGAGCCTGGCGAACAGTTTCGGCTGGCGCGAGCCCTGATGCTCTTCGTCCAAATCATCCTGATCGACAAGACC  
GGCTTCCATCCGTGTCCGTGCTCGCTCGATGCGATGTTTCGCTTGGTGGTTCGAATGGGCAGGTAGCCGGATCAAGCGTATGCAGCCGCC  
GCATTGCATCAGCCATGATGGATACTTTCTCGGCCGGAGCAAGATGAGATGACAGGAGATCCTGCCCGGCACTTCGCCCAATAGCAGC  
CAGTCCCTTCCCCTTCCTGTCGACACGTCGAGCACAGCTGCGCAAGGAACGCCCGTCTGTCGCGCAGCCACGATAGCCGCGCTGCCTCGTC  
CTGCAATTCAATCAAGGCACCGGATAGGTCTGACAAAAAGAACCGGGCGCCCCCTGCGCTGACAGCCGGAACACGGCGGCATCAG  
AGCAGCCGATCGTCTGTTGTGCCAGTCATAGCCGAATAGCCTCTCCACCCAAGCGGCCGGAGAACCTGCGTGCAATCCATCTTGTTCA  
ATGGCCGATCC***CAT***GGTTTAGTTCTCACCTTGTCGTATTATACTATGCCGATATACTATGCCGATGATTAATTGTCAACACGTCTAAC  
AAAAAGCCAAAAACGGCCAGAATTTAGCGGACAATTTACTAGTCTAACACTGAAAATTACATATTGACCCAAATGATTACATTTCAA  
AGGTGCCATAAAAACTTCACAAAACACACTCGCCAACCCCGAGCGCATAGTTCAAACCGGAGCTTCAGCTACTTAAGAAGATACGTAC  
ATAAAACCGACCAAAGAACTGACGCCTCACTTATCCCTCCCCTCACCCGAGGTCCGGCGCCTGTCGATTCAGGAGAGCCTACCCTAGG  
CCCGAACCCCTGCGTCTGCGACGGAGAAAAAGCCTACCGCACACCTACCGGCAGGTGGCCCCACCTGCATTATAAGCCAAACAGAACGGG  
TGACGTCACGACACGACGAGGGCGCGCGCTCCCAAAGTTACGGGTGCACTGCCCAACGGCACCGCCATAACTGCCGCCCCCGCAACAGA  
CGACAAACCGAGTTCTCCAGTCAGTGACAACTTCACGTACGGGTCCCAGATGGTGCCCCAGCCCATCTCACCCGAATAAGAGCTTTC  
CCGCATTAGCGAAGGCCCTCAAGACCTTGGGTTCTTGCCGCCCACCATGCCCCCACCTTGTTTCAACGACCTCACAGCCCGCCTCACAA  
GCGTCTTCCATTCAAGACTCGGGAACAGCCGCCATTTTGCTGCGCTCCCCCAACCCCAAGTTTCAGGGCAACCTTGCTCGCGGACCCAG  
ACTACAGCCCTTGGCGGTCTCTCCACACGCTTCCGTCCCACCGAGCGGCCCGGGCGGCCACGAAAGCCCCGGCCAGCCAGCAGCCCGCT  
ACTACCAAGTGACGATCACAGCGATCCACAAACAAGAACTGCGACCCAAATCCCGGCTGCGACGGAAGTACTGTGCCACACCCGGCG  
CGTCCTTATATAATCATCGGCGTTACCCGCCCCACGGAGATCCCTCCGCAGAATCGCCGAGAAGGGACTACTTTTCTCGCCTGTTCCG  
CTCTCTGGAAGAAAACCAAGTGCCCTAGAGTCAACCAAGTCCCGTCTTAAATGTCTTCTGCTGATACTGGGGTTCTAAGGCCGAGTC  
TTATGAGCAGCGGGCCGCTGTCTGAGCGTCCGGGCGGAAGGATCAGGACGCTCGCTGCGCCCTTCGTCTGACGTGGCAGCGCTCGCCG  
TGAGGAGGGGGCGCCCGGGAGGCGCCAAACCCGGCGCGGAGGCCGCATGCTCCAGACTGCCCTGGGAAAAGCGCCTCCCCTACCC  
GGTAGAAT***GAAGTTCCTATACTTTCTAGAGAATAGGAAC******TTCC***GTTGGTACCGTACGCAATTG
