# Supplementary material for: Floxed Il1rl2 Locus with mCherry Reporter Element Reveals Distinct Expression Patterns of the IL-36 Receptor in Barrier Tissues
Source: MDPI journal article supplement (doi:10.3390/cells13090787), 2024-05-06
Supplement: s1 [file s1]

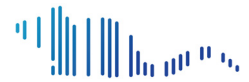

### JENSEN *Il1r12* Knockin Allele (Neo Deleted)

1. Outside Long Arm (Outside LA) (10451 bp): Plain text (e.g., ATCG)
2. Outside Short Arm (Outside SA) (13681 bp): Plain text (e.g., ATCG)
3. Long Arm (LA) (6173 bp): Bold and italic text (e.g., ***ATCG***)
4. Middle Arm (MA) (586 bp): Green text (e.g., **ATCG**)
5. Remaining Neo Cassette Sequence (83 bp): Red text (e.g., **ATCG**)
6. Sa.P2A-mCherry.pA(1243 bp): BlueViolet text, (e.g., **ATCG**)
7. Distal LoxP (39 bp): Lightgray text, highlighted in yellow (e.g., **ATCG**)
8. Short Arm (SA) (2062 bp): Underlined text (e.g., ATCG)
9. LoxP: Red text, highlighted in yellow (e.g., **ATCG**)
10. FRT: Underlined in red (e.g., ATCG)
11. Exon (mouse): Highlighted in pink (e.g., **ATCG**)
12. Oligo (forward): Highlighted in lime (e.g., **ATCG**)

LOX1: 5'- AGG GAA GCT GTC TTT AGA ACC AAG C -3'  
 PNDEL1: 5'- TCC CAA GTC TCC CTC TCC AT -3'  
 CHRRY SC1: 5'- CAC CCT TGG TCA CCT TCA GCT TGG -3'  
 SDL2: 5'- CAC ACG TAT CTG GGG AAG GAA AGG -3'

13. Oligo (reverse): Highlighted in magenta (e.g., **ATCG**)

SLD2: 5'- CAC ACG TAT CTG GGG AAG GAA AGG -3'  
 PNDEL2: 5'- CCA TCT GTT GTT TGC CCC TC -3'  
 A2: 5'- ACC TTC AAG GAC CTG TGT CAT TCC -3'

CATATTGGCAGGACACACGGGTGTTTAGAGCAGCTGTCTGTAAGTTAGTTACCCAGAATCCATTGTTAG  
 GCCATGCTCTGTGCTGCATGTGCCCTATGGACTTCATGACCCACATTCAAATGAAATAAAGAGATTTCT  
 GTACCCAAAGAAAGTCCCTTTTTATCTATAAATCACAGCATCATATCAAATAATATGGGAAGAATAAG  
 AATATAGGGCTTGAGGTATTTAGACGCTAGTGTAAGAAAAGGTGATTAGGGTCTGATCATATTGTATGA  
 ATATAGGGGGGCATTAAATGCTATGTGAGGGCAATTTTGTAGTAAAGCATGAGAATTTAAAAAGCTATTG  
 TGGGAGAGGATTGAAAAGAAAGAAATAGCAAGGGTGACTCTGGTATTTTGTATACATAGATGAAAACATT  
 ACAGTGAAACGTGCAACCATTTTAGAGTTGACATATATTAGTGAAAACAGAGGCTGACATTAACAAAAA  
 ATCTCAACATGCAATTTTGTCTTCTGGGAAGTTAAAAATAAACTCACTATATATTCTATAGGGAAAGTC  
 AAATGCACAAGTTCAAGGAGAAATAGGAACCATTTGCATGATGCTACTGTTAGAAAAGAAGCTATGGCT  
 GCCTTTGAAGATCCAGCCATGGAGAGTGAGGAGCACACGAAGCCCCGCCCTAGCTGAGAATGGGTGCT  
 GGCTGCTGGGGACAGTCAGTCTTCTTTGGTGTATGTCCCTTGGCAGGCTGCCTGTGCTCCAGAAGATA  
 GCTCTGTGTGAAGATAGCTCTGTGCTGAATCGGGTACAAATGACACTAGCTGAACTCAGAGGGACATAA  
 GTGAAGGGCATGAAGTTAGGAGGGGGATGCTCAGAGCAAGGCTCTGGGGGGGAGATGGAGTGGAGCAGG  
 GACAGATAGATATAACCAGAATACACTCTATACATGTATGAAGTTTATAAGGAATGAATAAAGTATGTT  
 TTTGAAATAGAAAAAGATTGTGCATAAAGTGAATGCTAGTGTATATGATTCTATTATTTAGGTTATATT

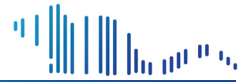

TTATACATTCAAATGAATGAAATGGTAGTTTTTTGTTAATAGTCAAAAGTTACAGTCTGAGTATAGCCT  
CTGTGACTATTTGTCTTAGTTAGGGTTTCTATAGACAATTTGAAGGTGTTTACCACGGACAAAGTGTAT  
TCAGGAACCACTTTGTTTGGGTTGGCCATGAGACAGCTTGTAGTCATTTTCATCTCTGATGAAATCAGGA  
CAGGAACCTGGAGGCAGGGACTGAAGCAGAGAGTATAGGGGGGTGCTACTTACTGGCTTCCTCCGCAA  
GTTTGCTCAACTCACTTTCTAAAGCCATTGGGGCCACATTACTAGGGATGGCTCCTCCCACAGTGGGCT  
GGGCCCTCCCTCCCACATCAATCACTGGTCAAGAAAATGCCCTATTGTTAGTCTGGTGGGAGGTTTCTC  
AGCTGAGGCTCCATCTTCTCAAATGACTAACTGTGTCAAGCCGACAATCAAACTAATGTGGAGACTAT  
TTAAATATATGCGGAAAACCTAAATGCACACTTAAAAAACACGTGAGAAGGCGCGTTGCTCTCTAAGC  
TTTGAAACAAAGCTATAATCTCTCTTGTGTTTTTAAAGCAGCCTTAGACTTTTGGTATTGCTCTTTCA  
GTCAGAAATGAATGTTGGTGTCTGTTGATTTATTGAATCCCTTTCCTGTCACGGCTCTAAATGTATTTTA  
TTTCCCTTTTAGCTTCAGATGGAAAGACATACGATGCCTATATTCTTTATCCCAAGACCCTGGGAGAGG  
GGTCTTCTCAGACTTAGATACTTTTGTTTTTTAACTGTTGCCTGAGGTCTTGAGGGGACAGTTTGGAT  
ACAAGCTGTTCAATTTATGGAAGGGATGACTATGTTGGAGAAGGTATGTAAATGTTTCTTGTGAAGTTAG  
TTGCTGAGTTCTGATTCTGGAAGGTTGGCACCATTGTACATATTGGAAGACTGAAGAATTATTAACCTT  
CCCTTAGTCATGTTGGGCCAATGTTTAAATTGACTTTTAGTATTCTGGAATGTAATGACTAGTTAGATCT  
AATCATATGCAACTGCTTTAATAGACTAGGAGTATTATAGATCAATCAACCTAACAAGAAGTTTAAAT  
TTTTTGCTGAGAGTTTTCCAGGTTCTAAGAGCAAAGTCCGTCTTTCGTGGGTGAGTTTTTGGAGCTGGT  
CTGTAAATTTTAAATTGTCTTTGAATCTCAAGTAAGGCAAGGAAGAAGCAACAGGGGACATAAAAAGGAG  
TCTGGGAAGAGCATCTTTGAGTGTTGAATTCAGGAAAGAATGTATTGATGGCCTCTTGCCTGACTGCAC  
TGCACTCTGTGTCTTACAGATACCATCGAGGTTACTAATGAAAATGTAAAGAAAAGCAGGAGGCTGATT  
ATCATTCTAGTGAGAGATATGGGAGGCTTCAGCTGGCTGGGCCAGTCATCTGAAGAGCAAATAGCCATA  
TACAATGCTCTCATCCAGGAAGGAATTAAATCGTCTCTGCTTGAGTTGGAGAAAATCCAAGACTATGAG  
AAAATGCCAGATTCTATTAGTTTCATTAAGCAGAAACACGGAGTCATTTGCTGGTCAGGAGACTTTCAA  
GAAAGACCACAGTCTGCAAAGACCAGGTTCTGGAAAACTTAAGATACCAGATGCCAGCCCAACGGAGA  
TCACCATTGTCTAAACACCGCTTACTAACCCTGGATCCTGTGCGGGACACTAAGGAGAACTGCCGGCA  
GCAACACACTTACCACTCGGCTAGCATGGCAAAAGTGGGCAGGCCAAGAACTTCGGAATATCTCCCATC  
ATAAGAGGCTGCAGCTGGGCTGTGCCTCCCAGTAAACAGTCACGAACCAAACCTGTGCAGTCCCTTGT  
TCCAGATCACCTGGAAGTGGATTGGGAAGAGAACAGGACTTGGTGGCCAGGACCGCTCAGAGAGCCATG  
GTTGCTCAGGGATGCTGCTCCGGGATGCTTGACTAACAGTCGAGGCAGTGAAGTGGGTGTAGAAAGCGT  
CAGGAAATGGCCACATGTGTGGATGGTTTAAATTAGATTCTGTGGAGTCTCACAGTGGGATTGTGTTGT  
CTGAGGACACTTTGGGGGGTCTGTCCAAGAAGTGGCTCCCCAAAGTATAAGTGCGGGTGAGGTTTAC  
TGATACCCACAGTGGAAGGCATTTCTTCCAGATATTTTCCAGATACCTTGGCCGCCAACTTCGTTTT  
CAAACACTGTGTTTTATTGTGTAGACCTTGAAAACCACGGTTTCAGTGAAGAAGGATTCTGTAGGGTTC  
ACTCTTCTGCAGTCACTTTAGCTTTCTGCAGAAGTCTAGATTTTAAATTAAGTGTAGAAGGAAGTCAGA  
CACCCACAGGTTTCTTCTAATCAAGCTTCCACCCTGCAATGGCTGTCTGTGCCATCTTCCTTCTGTGTTT  
TACTCGGCTCATTGCTTCTCTGGAGACAAATGCAATGCTTCCTACCCCGTCTGTGCAGGCAGTCTG  
AGGACTCACCTTCACACGTGAGACTTCGCTCTTACCCACAGCCCCACCGCTGGAGGGGTTTCAATCCCC  
CACCTGGGGCTCTTCTGCGCAGAAGCTGAAGTCTACGCTCCTCCCAATCTTTGGTCCCAGTGCCGCTG  
TTCGCCTTCTGTGGTTGATTGCAGAACCACCTCTGAGACCTCTGTACCTGCTCTTGGAAATGTCTCTG  
TCTTTGCCCTGCCGCCACTTCCCGTGCCTATGATTTGCTCTAGCATTTCTGCCACCTGACAAGGAGAG  
GAGCTTGCTAAAGTTTAAAGTTTATTTCAACGCTAAGATCCCAACCTTCCGATCTCTGCCTACTCTCAG  
ACTTGGCCAGCCCTCTTGCCTGTCATCCCAACCCTGCTGCTTCTCTGTAAAAGGTTGTTTCTTTACTAG  
CAGAAATCAGTCTGCAGGGAGGGGTAGTGCGTGTATCTCACTGTTTTCCGTATTGGGAACAGATGGTAT  
AGATTTGCCAAGGCCTTTATTTTAAAGTGTTCTTGGAAAATCGTATTTAAATTTGCAATTATTCTAATT  
TGATATAGAGAGAACTGACCTATTTAACAATGGACTCTCTTAATTCTACTGGACCCAGGCCTTGAAC



TTTCTGGTTTCTGTCTCTGTGCTCTGACTTTTTGATTTTCAGGTCTAGCCCTGTGCACTTACCTCAGTAC  
TCAGTACTTACTCAGTACTAACTCAGTACTCGTGGGAGGACACCCGACCCGGGTGTTCTTTGAGAAGCA  
GCTGAGTGAGGCATGTTTTGACAGGAGGAACCCAGTTCTTTTCACTGTTGGTATTTATAGCACCTACCT  
TCAGATTTTTTCAGTATGATGTTTCTATTTTCCAATACTGGTTCCCTAACGGTCAACATTTCTTCTCCCA  
ACTAAAAATGTAAGAAGAAAAAAAATTTTTTTCTTTTTCTTTTTTTTTTTTTTTTTGTGGTACAGAAG  
TTTTTTGTTTGGTTATTTGTTTGGTTTGAATTTAACTAGATGACTGTCTTCAGAATAATCCTCACAGTTC  
TGGAAGATTGAAAAACCAAGTTCACATGACAAGAACAACCCGGTTTTAAGGGTTGAATGTAGGGGGAT  
ACCATTCTGTCTTTTAGACTTTCAACATCTGCTATGGTGGAGCACAAATGTTATTTAAAGCATCTTCT  
CACCTACATAGAAGTAAACAAAACACACAATTTGGGATTTTGACTCTTCAGTTTTGACCTCACTTCTCC  
TGGATCCAACCTGACAGGAGATGACTGGATTGCTGGGGTAGAGAAGGAAAGGCTGTCCCCGACAGCAGC  
CAGAAGTCTGTGGGAGTGAGGTCATTCCCTGACCCGTGATGCTTTCAAGGCTTGGTTTTTCTGATAATTA  
TTTTTGCCTGTCATCCCAAAAACGTATTGACATGCGTGTATATTACCTGTGAGTGAGAGTTCTTAGAAA  
CTTGGCCAGAGAGGATAAAGGGGAGAGCAGTGACAGAGAACCGCCGATCTTGTGACACCCGGAGTCTGAG  
GTGGAACAGAGCCAGTGTGAGGAAAGCCCCCTCAGCAAGAAAGAAGAGTCATTGCTGGTTCAGGGGCA  
GTCACAGAGGATGAAATACCACATCAAGGCAGTGGGAACCTTCTGCGACTTCTCCTGGTCTCTCCCA  
AGTATCTGGTGTGAGCTGAAGACCATGTGTCCCCCAATACTTAGATTTACCGTACTTTCTGATGGTGT  
TTTTAAAAGGCCAAGTGTGCAAAAGTTTGCACGTGCAACCGTATATTAATCGCCAGTGTTTAAAAGT  
GTTTATCAGAATTTATATTTTTGTCTCTCCTGCCTTTTGAATTTTACTTATGACAGAGAAAGTATTGAG  
CCATGACTTTTTTAAAAATAATTTATATTTATACTGGTCAATAATGAAGGTTTTTTTTTTATTATTAAAG  
ACTTGATTTTATAATTCTGACAGCAGATGCCAAATGTTATCTATCACAAACCACAAAATTTATGTACAGT  
GCATATTATTGATCAATAAACTAACTTGTTTTCCAATAAATTGTTAAAGCCTCTTTTGAGTATCGCTG  
AAAGTTGGTTGCTCTGTCTTTTTTCCATCTTACATTCGTTCTAAGGCCTGATAGGAAGGGCCAGGCCTT  
TTGCAGGGTGTTCTTGGAGTAGGGGAGCTGAGATCTGTGCTGGTTAGTTTTATGTCAGATTGACACATG  
CTAGAGTCACGGGCAAGGAAGGAGCCTCAATTGACAAAATGCATCCATATTTCTGGGCTGTAGGCAGGC  
CTGTAGAACATTTCTTTAATTAGTGATTGGTGGGGGAGGCCCATAGTGAGTGGCGCTACTCCTG  
AGCTGGTGGTCTGAGTTCTACAAGAAAGCAGGCCGAACAAGCCATGCGGGAGCAACCCAGTAAGCAGC  
AGCCCTCCATGGCCTCTGCATCAGCTCCTACCTTGTTTTCTGTCTGAGTTCTTCAGTGATGAACAGTGC  
TGTGGAGGTATAAGGCAAAGAAACCTTTCTTCCGAAGTTGGTCATGGTGTATTATCATAACAATGATGAC  
TCCAATAAGACAAGGTATGAGGTTGATGGTCAAACAGGTAGTTCTGTGAACCTGACTTCCCTTACTT  
AGAGCCATCTGTTCTTTGTTTATGGAGTAGATTAAGAGCTAGGCTGCTGCTCTGTGATAGACCAGTTG  
CCTAGCTGAGGCCCTGGACTTGATCCTCAACACATCACTAACTGATGATAAACAAATGTAGATCTTAT  
ATTCTGTTATTGTTGCCATTCTAGCCTTTATGGGTAAATATCCATAGCTCTCAGACCAATAAGCAAGGT  
GTCTGAAATATATGTACTATGAAGCGTTGAGTTCAGTGGCCTTCATTTTATTGAGTAAACCACTCAATA  
AAAAGTTAAAATAGTAGGTATGCAGAAGTTTGCAGTCTGGTGTCTGGAAAACCTACTTTTCCTAAATTC  
CTCACCCAAAGAATCCAATATGCCAGTGTGCTTTTTGTTCTTCGACCAACAAATGTTTGTCTTAGCCATG  
TGTTAGGTCAGATCTAACACTGTTAACACGTCACATATAATGTCTCTCTGTCAAATGCCGTTCCCAGCA  
TATTTTGAAGTAGCTTCTTTTGGAGATCGAGGTCTCTGGAATTATTTCTCCCTAAGAGTGCCACTTGCT  
TTCAAAGTTGCAAATTATGAATTTCTCTCCAGTTGTTCTGAATGAGGGCAGAGCGCTGGCTGCTTTAG  
AGCCCAGCTTTCTCTCTCTGGTAAGACTTCATATATATCCAGGTCACACAGGAAGCATCTCCATCCGG  
TACCTGGGACTGAACTTCCAAATAGACCCTCTTAGTTTTAGCAGCTAGTGGACGATACATTGAGAAGTG  
TTTTCACATTCAGTAGAATAAAACGAGAAATGAATCCTTGACAGCAGCAAGGATACATGGGAGACAAGGC  
CTCTGTGTGTAGGGGGGAGGTGGGCGTTTGCCTGTGCGAGCACGTGTCCAAGTATATTCTGGAGAAGGAA  
AACCTTACAGGGAATGGATGACACCATTTAAAATGAGCACCGGCCTTCAAACAAAGGCATACTCCGCT  
GGTTGCCGACTGCTCGGGGGTCACTGAGGAAGACTTGGCTGGCTTGGGCAGCTAACTCCTGTGTATTA  
TTTCATCTTAAATCTGAAGATGAAACACTAACACCGCCTCTCTGAGCCAGGGAGCAAGCGGACCAGTCT



GGCCTGTCTTGCTAGACTGTGGGCTGGTAGGATCCTGTTGACACCTGCTAGGATCTCAGCAGGCTGAGA  
GCCGTATCTATTCAACCTTTTTTAGGACCTTTTACCTAGAATGGGTGGCGGTGTCATTTGGGCATTGT  
TTTCTGGTCAAAACCTCTGGTTTTGACAGGTGCTTATTTCTGTCTGGCTCCTGATTTTTTCCCCCTTCT  
CAACTTTCCTTGTCAGCTTTCCTGAGTCAGGTGCAGCGCCTTATTTACCTTGAGGGCTGTGGACAGT  
GGCAGTCCCTCCTGTACACTTAGTCATTAACCGAGTTTCTGTTCTGCTTCAGTGCCCCCTCAAGTCCTGT  
GTTTCCTGCTTGATTGATACATGTGGCTAATATCCAGACTCTAAAATGAACTGTAAAAACCAACGCC  
AAGGAAACGAGATGTCCAGTCGGCAAGCGGATGAATGATAGAACAGGCAGATTTCAAGGAAGGAAACAC  
AAGGGGATGATGGTGGATATCTTTTTAAAGTGTACTACATCCCTAGTCATCAGGGGAAATGCAATTA  
AACTACAATGAGATGTAGCCTCTTATGGTCGTCATAATGGCTATCACTAACAACTCGACACCAGATGT  
TAGGAAGATGCTAAGAGAAGCCTTACTCTACACGGGTGGCAGTGAAGCTTAAGACAGTCATTACGGAAA  
TCAGTTTGGAGGTGCCTTGGAGGGCCCATGCTGGGTGTCATCCCTGTCCCTTGAGGTACCAGCTGTAGG  
ACAGATCTAATATAGAATGAAGTTTAATTGGGGACATGGGATGGAAAGTTGAGAAGGGAGTAGAGACAG  
AGAATGAGAGGGGACAGGGAAGGAGAAAAGAGAGAGAGAGAGAGAGAGAGAGAGAGAGAGAGAGAGAG  
AGAGAGAGAGATCAGAAAGAGAAAAGGGAGGCCAAAGAGTCCCTTTTAGTAGCAAGCCAGGACTACCAGG  
CTGTTGCTAGGTAACCTGTTGGATGGAGCCTAGAAGGAATGCTAACACTAGCCTTTAACACACAGAGGTT  
TATATAACTATATTATATATACACATATATAAAGGAGCATGCATGCAGCTATAGTTTAATATGCCACTT  
GGAGAGGAACAAAGGGTAAACATTGGGTGTGAACTGAGCAGGACTGAATGCAGCTGGGACAGGCCACGT  
GAGTCATAAAAGAGAATTTAAGTGCCGGGCGTGGTGGCACACGCCTTTAGTCTCAGCATTTGGGAGGCA  
GAGGCAGGCAGATTTCTGAGTTCAAGGCCAGCCAGGTCTACAAAGTGAGTTCCAGGCCAGCCAGGGCTA  
TGTGAGTGAGAGAGAGAGAGAGAGAGAGAGAGAGAGAGAGAGAGAGAGAGAGAGAGAGAGAGAGAGAG  
AATGAATTTAAAGCTGATCGTCTAGTTTAATTACGTCATGGGGTTTTTCATTTTTTGTGGTGGCTAAGAG  
CACATCAATGTGACTGATAGTGAAGGTATAAAATCCACAGTGAGCCTCAGAACAGCTCTTGTATGAGGA  
GAAGACCTCTCAGACAGGCAGACCTCGGGGCTGGGCCAGGCCTTGTGTGAGTTGCCATGTCAGTCTAGC  
TGCGTGACTTTTTTTTTTCTAATTTGCAGATTCTTCATAATAAATTGATTAAAAGAAATAAAGCCAGTC  
TCATATCCTTCACTGGATTTCAAAGCAGAGGAAATATGCCTGCTGTCAAGCTTATGTAGATATTCTAAG  
AGTATTAACCTTGTGCCTAATGGAGAAAATCGAGGAAAGAAGAACTGGGATCCAGCGAGAGAGAAGGCT  
ATGAAGGAAGAGTTGAATTCTGGCCTTCGGTTGCTTGTCTAGCCCTGTATGATTGACAGCATCCATGAC  
ACAGGGAGGCAGGAGTGGTATCTGCTGTTGCTGTTTCATAGGCAGCCAGTACTGAGCCTTTCCTTTTGC  
CAGCATGACAGCAACTGGCAGGCTGTCCACCAGGATCCCTCAGCCCTTGATAGCAGCCAGCATTACAGC  
TACCAGACCTAGGTGTCCGGCACTGTTGCTTTTTGGCTTTGAAAGCTTGGGAGCTTCCTGGAACCTCTCC  
AGACACCAAAGCCTCAGTTTGTCTTCTCTGCCTTGGTATACTAGTCTTCCTCCATAAAAATATCGGTC  
AGCCATCCTTCCTCCTGCCCTGGCTGCTGTCTTGAACCTTAGGGTGTGAGAATACAAGAATACTTGT  
AAAAAAGACAAAATTAAGGTATACGTGTGTGTGCATGCCTCTGTGTGTGTGTGCTTGTGTGCGCT  
TGTGTGCATGCATGTGCGTGTACCCAAACAAGCTTTAGAGAAGGGGAAAATTACAGGAAATGGAACCTC  
CCCCCTCTCCTGTTTACGAGTTAGACAACCAGGCACTTTTCCACTTTGGCAGTTTGGCCTGTCACTTGT  
ACTGCCCCCTCAGAACTCCTCTTCTGTCAGGCAGCTAGCTACCTTGCCCCCTTGCTGAGAGAGACCACTG  
GGGAGAAGCTAGTGTGACAATTGAAGAGAGGCAGAAGGGTGTCCCGACAGAGAGAGGCTGAGCAGAATG  
CTTAGATAGCTGCAAAAGGGTGTGGTACCAATCAGAGCACTTCACATGCATATGGAGGATTCTACAGA  
CATTTACCACTTATATTCAGCCATGGCTGTCTCTGTACCAGCCCACTGGGGTATGTGTTCCCTTTCTG  
GCTCAGGCAGGAAAGAATGCAACATCCTTTGGAGTTCACTGAGGCCCAAAGCAGCAACAAATCTAGTAT  
GAATTGTCTGAGACTGCCCGGCAGAGGCTACACCTTCAAGAGCCAGCACACTCCATTGAGAACTTGGGG  
AGCTGCCTCAAGGCATCCACCAGAGAGTTTATGGCTCAGCAGCTAAAGGTACTTTCTACAAGCCAGGTG  
ACCTGCACTCAATCCCTGGAACCTTGTAAAGATGGAAGGAAAGAACCTGCCCCCAAGGTTCTCTGAT  
GTCCATATATGTGTCTTGGCACATGTATTCTTACCCTAGAGTGTGCACTCTTGCGCATGCGTGCACAC  
ACGTGTACACACACACACCACTATATGCCCTCACATATACATATACCCCTATATGCACACACACCCCTA

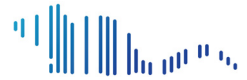

TATGCCACAAATATCCTATATGCACACATACACCTATGTGCACACACATACCCCTATCTACACACACA  
CATTCACATCCATACACATACAAAACTTAGC**ACAAACCTTTGTCCATGCTGCTCTACTTGAAGAATGC**  
**TCTGTAAGTTGCTATTAAGGCTGCCAAATGGATAGCTTTTCTGTTTCTCTTGGCCCTCTGGATTTTCTT**  
**TCCCCTAGTTTTTAGATAGGCAGAACCAAGCCACCCTTCCAAAGTCACTTGCTCCTCTCCCTGATAGT**  
**TTGCTTGGTGTGGTTACAGAAGGACAGTAGCTCTTCCGGTTCTTGGCTGACTACATTCCACAGAGACTG**  
**TGCGGCTCTCTCACACACAGGGTTGCAGTGTGGGCACACACCTAGAAATCACTGTGAGTGTGAGAGTC**  
**AAAACCGATGTCCTTTGAAATGAATGCTTCTTTATTAGTTAAGTATTAATGTTTAAAAGCTTTACTTAC**  
**AAGTACCTGGGCTATGGGACTGCCCTTGCTCCCGATTTCATGCCAACCTTCATTAATGGCCAAGTGTGCT**  
**GAGACAGGAGCCAGGTCTTAACCTCCAGATAACTAGTTACCCTTCTAACCATCTTCTTTCTGCAGA**  
**TGACATTGGAGAGGAATAAATGCAAGTCCTTTATTTTTGATAAGGACATATGTCCGAGTTAAGTTTGA**  
**AAAGGTAGCCCCAGGAGCATCAAGAGTAGATAAGGATTTAGGGTGTTAATGTACAAGCAGAATGAGTTG**  
**CAGCACTGGTTGGCACCAGAACTTGCCAGCAGCTCCAGGGCCCTGTGACTAGGAGCCAGCACCCTTGG**  
**AAAGTGTGAGGGCAGATGGCTTCTTGCTTGCCAGGCTGGAAAGACCAGGAGACATCAACTACTGACTAC**  
**TGGCTGAGTATCCTGAAGATCTGTTTGCACCTCTACCTCTAGTTATATGTTTTGAAGAGAAGTGTGATC**  
**GAGGAATCATAACGAGGTTAGATAGATGGACAGCCGTCTGGAAACTAGCTTCCTCTTTCTATGGACCC**  
**AGAGGAACAAGACTCCTGACGGAGGCCACACTGCCAGGCTTCCTTTTTCTAGAAGGGGAAATGATTTGC**  
**TAATAGGACTTTAGTTTGTAGTGGGAGCTCTTGGAGGCAGTGGGTTTCTTCAAGCCCAGGCTAAAGGAC**  
**TCCTGGATGTGTGCACTCGTGGCTGTGACTGTAAAGAATCACACAGTAATCATTAACCTTCTGAGGCTCT**  
**GTGGTGCTGGTTATCGTACCAGGCGGCACCCCATGTATTTGCCGCTCTACCCAACACATATCCAGATTT**  
**TAGGTTCTACCCCAATGTATGGTTTGTGGGTCTCTAAATTTTCATGTTAGACAGAAGTTGAGAAAGTGCT**  
**GAGATTTATGTCATAACCATATAGGTCAAAACAGAAAGGCCAAAGGGAGTATCTTCCCTCTGGTATCTGT**  
**GGAGAGGTTGCCTGACTGAGCAACCAAGGCGCACATGCACATAGCCAACACAGATGAACACACATAATT**  
**AAACATAGTCAAAGTAAACTTAAAAAGTAGAAAGAGAGAGCTCTTGCCCCAGACATCTACCTGTTGGC**  
**CCTAGAATATGGAGACGGACAGAGCTTCCTCTCCAAATCAGAAATACCTTGTCAGAGCTGGTAATGACC**  
**TGGGGCCAGGGCCTTGGGGGGAGCTGTGACCTCAGATCCTGAGATCTCAACTCTTCTGACTGTATGGAG**  
**TTATTGGTTATCAGTCTCAAGGCCATTGTATGCATGGCCTATATATAGTATTCTCCAGAAACCTGTGT**  
**TCCTCTCTTGCAACACTGTTTGATTAGCTTCCTGCTGACTTTGTCCCGTTGTGGGTAGCTTCTTTGGA**  
**CACCCCCATTTCTCCCCTGGAAGTTGTACATCAAATAATGCTGTACTTTTTAAATAAGCTTGCTTGGCT**  
**CAAGCCATAGCTTGTAACAAGACCTCCAGATCCCAAACCTTTTTTTTTTAAATCTTCTCTCTCTCTATCCT**  
**CTTTATCTTCTGATCTCCTGGTTCTCTCTCTCTCTCTCTCTCTCTCTCTCTCTCTCTCTCTCTCTCT**  
**CTCCCTCTCTCCCTCTCTCTCTCTCTCTCTCTCTCTCTCTCTCTCTCTCTCTCTCTCTCTCTCTCT**  
**GTCTAGGCCCTAACCCCACTCTCTGTGTCTCAGGGGAACACAGCAGCCATGAGCTCAGTAGCACACAC**  
**CGACTTGCCCTGCCTTTGTGTATTATTAGATCTACTCTTCCCCATGCAACTCCCCGCCCCCATGCCT**  
**TCACCCTGCCATTCTCTTCAGCTCTATGTGCACCTGGTTTGAAAACCTGTGCTGTTCCCTTAGTGCTT**  
**TGCGCTTTAGGCTGTCTTTAGTGGTAAAGGTACCAATTCCGGGGTGAGGAGGAATTAGTGTGAGATTAT**  
**ATTTTTCTGATTTAAACATTGTAATATCTTTTAATTTTGCCCTATAATAATGGCAGCCATTGTATTGTC**  
**GTTCCAGGCCCCCATGTGATCTAGCCACACCTACTTCCATACTTCAGTTTACCCAGCTCTCCCTCTGC**  
**TGTGTGGCAATCACTCTCCCTTCATTTTCAGTTTTTTTTTTTTGGAGTGTCCCAAACCTCGGTCCTTCAGAG**  
**ACTTTGTAAGTACGGTTCACTCTGTAGGGATGTAAATGGCTGTTGCAGAAGATCAGACTTTGGTCCCCA**  
**GAACCCATATCAGGTAACCTCACAAACACCTGTAATTCAGCTCCAAGGGAGCCGACACCCTCTTCTGGA**  
**CCCTATGGTCACCTGCAGTCACATGCACATAGCCAGTGCAGATGCACACACATAATTAAACATAGTAAA**  
**AATAAAACGTAAAAAGTAGAAAGAGAGAGCTCTTGCCCCAGACATCTACCTGTTGGGCTCCAGGCCACT**  
**GCTCAGGAGAAAGGCTGTGCCTTATCATATTCTTTCCACCTGTCTCCTAACTGTATTTTCATATCTTATG**  
**TGCTTCCTAATAGTTGAATATCTCTTTTAAAAAAATGTTATTTACCAGAAAATCATGGTGGCAAGCTGT**  
**TGAAGGGCTCATGTCTCTAAGCTGTCTTCCCAACACTCAGTGTGCCATCGGACACATTCGGATGCCTTT**



AATATTTGGCAAGAACATGGGGCATCAGAATCCTTCTCTAGAGAATGGTGTGTCATGGAATAATCAGTCAG  
AGGTTTGCCAACGCAGACGAGGGCACACCTACCTAATGATCCAGGAGCTTCTCTCAGACGTGTAAGAGA  
CATTGCCAGGATTGTGCGGGCAACATTATGTATAATAATTAGCAAAACGTAAAAAAATGGGACAACCA  
AAATGGCTAAGGGAGAGAGACACGTCGGTTGCTCATGCTCACAGGATGGGGCAAGCCTTTATTGAGAAG  
GACCACACCTCAAATGTTTAAATCCCGCAAGTATAATGCTTTTATTAAAAAGTAAGTTATGTAAGTGCA  
CAGTATAGTAAATTTTATACAGTGACTAGGAAATCTTATGTAAGAATATCTTACATTGCTTAAGGAATT  
TCCTGCTTCTCCCTCTCTGCTCTCCACCCCCACACACCACTCAGACACACACAAAGGGAGGGGGAGGGG  
AGAGAATAAGCACCAAGCTGAAGACTGGGAGTTTGGGTTTGGGCGGACAGAGACCGGAAGCTGGGAGAT  
GATGGCTTCTGATGTTTGTGCTTACGCGACACAGCTTGTTTGGAAATTAATGTGGCCCTTGACAACCTGCG  
TGGCACACACTTCAAGATACAAAAGTGAGAAGAAGAGGGGGGTACCAGAGGAGACTGAAGTCAGTAAG  
TTTCTACCAAAGCTGGGTTTCTTCTGGCCACTCCAAACAAAGCTGAAATTGTCTTCAGACCTCTGTGA  
GTACAGTCTCAGTTCCTTCCGTAGTTCTCTGGGAGGTTCTGCGTGCACACAGTGATAGTTTTGTGTTT  
TTATTTTTTAAACCTCAATCAGTTTTGTCTTAATTTTATATAATTACTGGGGTTTGGTGCGCACTAATTG  
AACCAGCTTCTTTTACCGGCTTCATCCACCCACCCCTGTAATCTCTCTTCTACATCTTAGCTTCCTG  
TTTGTTTAAATTTCCGTATAGGTAGGACGTTTCTCTGTTTCTCATTCCGCTTAACGTCGTGGTTTTTGT  
TTTTGTTTTCCCTGAAAACCTCACTATCCCATATCTGTTCTGTATCCAGAACTAATGATTGATTCTCA  
TGCATCAGCAGACTTACTCAACACAGAGATCATCCAGAATTGTAAGGCAGAGTGCTTCTGCCAAGGGA  
CAGTACTCGGACAGACACGTGTACATCTTAACCTTGTGAACCTGGGACAGCTAGTCAGACTGACGCTGT  
GGTTGTTTTCAAAGTCTTACAGTTTCTAATCCACAAAGACTCCGAGGGATGCCCACTAAGAAGCTGTTG  
GTCTGACAGCGTTTGCCGCCACTGCTCTTCTCAGTGCTAGTGGGGTCTCCAGTGTCTCTGGCGCAGGA  
AGACAGGTCCGAGCAAGCATTACTTTATGGCAAGTTTAGACTGACTGTATCGGTGCTCAACCTGTGCGG  
AGTCTGCTTTACCTAAGATCTGGCACGAGGACGGGGCTGGGGTGGGGTTAATGCCTTTTTCTCAGAAGCG  
CTTCCACCTCTGGAATAGTCCATTTTAGGACAGTGCTGGGTGTGTAAGAACCGCTCAGATAGTGTTTGG  
AAAGGATATAATAATTTTTAGCGATGATCTGGAGCATAATTAAGCCGACATTCTGATAGATGAACGTG  
CTGGCCTGGGATCAGGAAAAAAGACTGAACGATTTTCGAAGGACGGATTATTTCTGTCTGCTCCACT  
TGGGGAAGGTGAGTCTGTTCCGCCCGCGGCGGAGAAGCGATGCCCAAGGTGCAGAGTGCGGTGACCAAC  
CAGGATTCGGTCCCCAGAGTGGTTCCCGCTCTGCTCCACGAGACCCAGCGCTCTGAGACCCCATAGGCA  
GGTGGAGCAAGCCCGGGGACGCCGGAGCGGAGGGAGTTAGCGATCAATAGTCACTGGGGCGGCTAGAAG  
ACTCCGACCTGGAAAGTGGGCCGGGACTTGGGTCAAACCTCTGGGATTCTGCTCTCCCTTGCCCTTTCC  
AGGTGGGCCAGCACTTACCGCTCAGCCAGCGAGCACATAGGGTTACAGGGGAGCCCCCTCCGACCCATGC  
GATCCAGATGCACGCTGGGCGGGTCCACAGTCTGCTCTGGCTGGGGTTCACTCTCTGGCCCTGGCTT  
GATCCAAGTGCCAGCACATCTGGCCCTGTCTCCCAACTCCCCACCAGTCCCCTTCACAGGCCAGTCGGC  
GTTTACTGGCTTCTGAAGGTCTGGTGTAATGGAGATGGGGAAAGGCTGGCCTTGGAACGGAGGGAGGCC  
AAGTGGAGGGCTCCCCATGCAGAGGGGAAGGAAGGCCAGTGACCTGAACTGGGACTGACATTCTGGATT  
CTCTAAAATTGTGTGCGGGAAGGTACCAGCCTCACTGCATCCCTTACTTCTACCATTGTCCTCTCTTTT  
CCTTTGTAGCCTGAGATGGGGGTACATCTTTGCTCTTCTGTGGGGTGTTTTTCTGCTTCTGCTTTTC  
GTGGCAGCAGGTAAAGTTCTGCGGGTCTGTGAGTCCCTGTATCCAGAGACCTGTTGCCTTGCCAGCAGC  
ATCCTTTGTCATTATCTCCGTGCCCCCTGACTCACCCACTTGCCAGGGGCATCAACTAAGCCCCAACCTT  
GCTAGTCACTCTTTCCACCAGATAATCTGGCAGGCCGGTCAAAAAGGGAGCGGGGAGGGAGGGATAGGA  
AAAGTTCATTCCCAACTTCTTGGAGGCTCAACCCCCAAATGTCACCTTGGAACCTTGGACTAACAGGTG  
ATACAGAGAAGTCTCAAACACTCGAGTGGACTCAGTTCCAATGCTTAAACAGATGGGCTACTAGTGTC  
ATCTATTTCAATATAAAGGGCTATTTTATGGTCCAAACTACCAGAGAGTACAAGTTTCTAAGAAAACCC  
AACTTGGTAGAAATGGGCTTTAAAGGGAAGCTGTCTTTAGAACCAAGCACTGTGGAACGAGGATACATC  
TGACTGCAAGTATAGGCAGGAAAACGACCAGGTTGGTTCTATGTTGAGACAGAGACTAAGGGCAGAAGA  
GTGAACAGATACAGACACAGGGGCCGTGGTTCTGTGGAGGGTCTGGGGAAGCCTTGTCCTCACTATAC

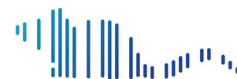

ATTGAAGGTCTTAGCATTATGCTTCTAAATGACTGGGCTAGTTTGGGGAAACACCCCAAATAACTTCG  
TATAATGTATGCTATACGAAGTTATGTACAAACTCCTAAATGCAATTTACATTGACCAGAGCAAAATA  
TTCCCTAAAAAGAATAATGACTCCAGTTTTCTGCCTTTATTTTATTTTATTTTATTTTATTTTATTTA  
TTTTATTGTTTTCTTTCTTTCCCCAGATACGTGTGAGGACATTTTATGCACAATGTGATAATTTTCAG  
AGGGCCAGCCTTTTCTTTCAACTGCACATACCCGCCAGAAACAAACGGGGCAGTAAATCTGACATGGT  
ACAAAACACCTAGCAAAAGCCAGTATCTAACAACAGACACCTTAGAGTTTACCAGGACCAGACCTGGA  
TCTTGTTTTCTTCCATTGACACTGGAGGACTCCGGTATCTATCAGTGTGTTATAAGGTAAGTCCTTCATT  
TAAAGTGGAACATAATTCCCAAGTCTCCCTCTCCATTCTCTAAAGACAACCTTTTTAAGAAAATGGGTATTA  
TTGGCCTTTATTTTGGAGACTTGTTATATAGCCTAGACAAGTTTCCAAGTCTTTCTAAAGTACTGAAA  
GGACAGGTGTGAACCACCACAACCAGCCGCTACACACCACAACCAGCTGCTACACAAATGCGTACGTTT  
GTGGGATTGTGTCCGTGTGCGGAAGTTCTTATACTTTCTAGAGAATAGGAAGTTCGTTGGTACCGTACG  
CAATTGATAACTTCGTATAATGTATGCTATACGAACGGTACTAGCGCGCCTCGACTCTAGCCCCCTCGA  
CTAGAGGATCGAGCCCCAGCTGGTTCTTTCCGCCTCAGAAGCCATAGAGCCCACCGCATCCCCAGCATG  
CCTGCTATTGTCTTCCAATCCTCCCCCTTGCTGTCTTGCCCCACCCACCCCCAGAAATAGAATGACA  
CCTACTCAGACAATGCGATGCAATTTCTTCATTTTATTAGGAAAGGACAGTGGGAGTGGCACCTTCCAG  
GGTCAAGGAAGGCACGGGGGAGGGGCAAAACAACAGATGCTGGCAACTAGAAGGCACAGTCGAGGCTGA  
TCAGCGAGCTCACTTGTACAGCTCGTCCATGCCGCCGGTGGAGTGGCGGCCCTCGGCGCGTTTCGTACTG  
TTCCACGATGGTGTAGTCCTCGTTGTGGGAGGTGATGTCCAAGTTGATGTTGACGTTGTAGGCGCCGGG  
CAGCTGCACGGGCTTCTTGGCCTTGTAGGTGGTCTTGACCTCAGCGTCGTAGTGGCCGCCGTCCTTCAG  
CTTCAGCCTCTGCTTGATCTCGCCCTTCAGGGCGCCGTCTCGGGGTACATCCGCTCGGAGGAGGCCTC  
CCAGCCCATGGTCTTCTTCTGCATTACGGGGCCGTTCGGAGGGGAAGTTGGTGCCGCGCAGCTTCACCTT  
GTAGATGAAGTCGCCGTCTGCAGGGAGGAGTCTTGGGTCACGGTCACCACGCCGCCGTCTCTGAAGTT  
CATCACGCGCTCCCACTTGAAGCCCTCGGGGAAGGACAGCTTCAAGTAGTCGGGGATGTGCGCGGGGTG  
CTTCACGTAGGCCTTGGAGCCGTACATGAAGTGAAGGGACAGGATGTCCAGGCGAAGGGCAGGGGGC  
AGCCTTGGTCACTTCAGCTTCGGTCTGGGTGCCCTCGTAGGGGCGGCCCTCGCCCTCGCCCTCGAT  
CTCGAACTCGTGGCCGTTACGGGAGCCCTCCATGTGCACCTTGAAGCGCATGAAGTCCTTGATGATGGC  
CATGTTATCCTCCTCGCCCTTGCTCACCATAGGTCCAGGGTTCTCCTCCACGTCTCCAGCCTGCTTCAG  
CAGGCTGAAGTTAGTAGCTCCGCTTCCGTCTTCAACGTATCTGGGGAAGGAAAGGAAAACAATAAAAT  
AAAATAAAATAAAATAAAATAAAATAAAATAAAGGCAGAAACTGGAGTCATTATTCTTTTTAGGGAAT  
ATTTTGCTCTGGTCAATGTGAAATTGCATTTAGGAGTTTGTATAACTTCGTATAGCATACATTATACGA  
ACGGTACGCGTAGGGCAGCCTTGAAGTGGCAGGAGATGACGTCCAGTGAGCACTTTTGAAAGCAGAAC  
GCTTTAGAAATAACTTTTGGAGCACAGATTGCACCATCTTCTTCATTGAAGTTTTAGCCCAGACCAGCT  
TACAGAGAGAGGTGTTTTATCAATGAGATTGCTGCCATTTCCGAAGATGGCTAATGGTTTTGGAAACT  
GGCTGATCCAGACCCAACTAGATCATTCAAACACATCTGATAAGGAATCAGCTTAAGGCAGACATTTGA  
AAGCTAGCAAATCTGGGAGATGTTCTAGTGTCTACATGAATCCATGTGCCAGAGGTAATGTTTTTGAGT  
GGCAGTGGACTACTGAAGTATTTCCATGGAAGACAATTTTGCTTGGAGAGTACTAGAGTCTGCTAGAAA  
ATACGTGCCCCACCAAAGGCACCTTCTTCCTGTCCCCAGTCTGTCTCTGTCTGTCTGTCTGTCTGTCTCT  
TTCCCTGTCTCTGTCTTGCTCTGCTTGTCTCTCCCTAGTTCTCTCCCTTCCCTTCTCTTTTCCCTTTTCA  
GTTTGTAAGATTTTCAAGAGTTCAATAAAACCCACCTGTAAACTCATTGTCCTGAGAATTAAATTT  
CTCTGACTTTCCACATAAGCTTGACTGACAACAATGTATTATGTACTCTCTCTAAACCTTGCCCTTTCCC  
ACCTGTAAATTGGGTGTGTTCTGTACGCCTTTAACTTTGTTTACCTGGAGCAGCTTTTAGTGATTAGG  
TTCCATGCTGTGACAGTTTTTAAGGGATACAGGCAGTCTCACAGATCAGATGTGTATAAGTGTAGGTGA  
CTTCTGTACCAGAAGTGAAGTGTAAAGCACTGTATGGAGTCTTCAAGATAAATAGTTCAAGAGGTTTCATGG  
TGGCCCTCAGTGGCTCCTGGGCCGTGCTGAATGAGACACCAGTGTCTACCCTGATGAATACCCTTATC  
CTTGGTTAGTGCATGGTTTGAGGGTTGGTTATTCTTTACTTCATATGAGGCAGAGGGTTTGTGCAGTGT

GGAATGACACAGGTCCTTGAAGGT





ATTCTTGGGTATGTAAAACCATCTGTTAAATCCATTAGTTCACCTGAGTTTGTAATTTTCTTTCTTTCT  
TTTATTTTCTTTCTTTCTTTCTTTCTTATTTTCTTTCTCTTTCTGTCTGTCTTTCTTTCTTTCTTTT  
CAGGTGTTTGTCTAAGACTTTTATTTATGTGTTCTTTGATTAAATTACAGTGTTAGAACTCAAACCCA  
GGCCTTGTACATACCAGGCAAGAGCTCTATCACTGAGCTACATCCTCAGCTTTACAAAAGTTCTTTTT  
TTAAAAAAATTTTTTTAAATTTTAAGATATTTTCTTTATTCACATTTCAAATGTTATCCCCCTCTCCTA  
GTTCCCCCTCCAAAATGCCCTATCCCCCTCCTCCCCCTCCCCCTGTTCCCCAACAAACCCACTCCCATTCC  
TGGTCCTGGCATTCCCCCTATACTGGGGCATAGAGCCTTCAGAGGACCAAAGGCCTCTCCTCCCATTGAT  
GACTAACTAGGCCATCCTCTGCTACAAATATAGCTAGAGCCACATGTTCTACCATGTGTTTTCTTTGAT  
TGGTTGTATAGTTCCAAGGAGCTCTGGGGGTACTGGTTAGTTCATTTTGATGTTCTCCAATGGGGTTT  
CAGACCCGTTCACTCCCTGGATACTTTCTCTGGCTCCTTCTTGGGGACCTTGTTGCTCCGTCCAGTGGA  
TGACTGTGAGCATCCACTTCTGTATTTGCCAGGCACAGGCAGAGCCTCACAGGAGACAGCTATATCAGT  
GTCCGGTCAGCAAGCTCTTGTGGCATCTGCCTAGTATCTGGGTTTGGTGGTTGTTTATAGGATTCATC  
CCCAAGTGGGGCAGTATCTGGATGGTCCTTCCCTCAAGCTCTGCTCCAAACTTTGTCTCTGTAACCTCT  
TCCATTGGTAATTTGTTCAACATTCTAAGGAGGAGCAAAGTATCCACACTTTGGTCTTCCTTCTTCTTG  
AGTTTCATGTGTTTTGCAAATGTATCTTGAATAGTCTAAGTTTCTGGGGTAATATCCACTTATCAGTG  
AGTGCATATCATGTGTGTTCTTTTGTGATTGGGTTACCTCATTCAAGATGATATCCTCCAGATCCATCC  
ATTTGCCTAAGAATTTAATAAATTCATTGTTTTTAATTGCTGAGTAGTACTCCATTGTGTAAATGTACC  
ACATTTTCTGTATCCATTTTCTGTGAGGGACATCTGGGTTCTTTCTAGCTTCTGGCTATTATAAATA  
AGGCTTCTGTGAACATAGTGGAGCATGTGTCCTTACTACAAGTTGGAGCATCTTCTGGGTATATGCCCA  
GGAGAGGTATTGAAGGATCCTCCAGTAGTACTGTGACCAATTTTCTGAGGAACAGCCAAACTGATTTCC  
AGAGTGGTTGCACCAGAATGCAATCTCACCAGAAATGGAGGAGTGTTCCTCTTTCTCAACATCCTCGCC  
AGGATCTGCTGTCACCTGAATTTTTGATCTTAGCCACTCTGACTGGTGTAAGATGGAATCTCAGGGTTG  
TTTTGATTTGCATTTCTCTGATGATTAAGAATGTTGAACTTTTTTTTTCAGGTGCTTCTCAGCCATTCGG  
TATTCCTTAGGTGAGAATTTCTTTGTTTAGCTCTGTACCCAATTTTAAATAGGGTTATTTGATGTTTCTG  
GAGTCCAATTTCTTGAGTTCTTTATATATATTGGATATTAGTCCCCTATCAGATTTAGGATTGGTAAAG  
ATCCTTTCCCAATCTGTTGGTGGTCTTTTCGTCTTATTGACAGTGTCTTTTGCCTTACAGAAGCTTTGT  
AATTTTATGAGGTCCCATTTGTCAATTTCTTGATCTTATAGCACAAGCCATTGCTGTTCTGTTCAAGGA  
TTTTTTCCCCCTGTTCCCATATCTTCAAGGCTTTTCCCCACTTTCTCCTCTATAAGTTTCAGTGTCTCTG  
GTTTTATGTGGAGTTTCTTGATCCACTTAGACTTGAATTTTGTACAAGGAGGTAAGAATGGATCAATTC  
GCATTCTTCTACATGATATCTGCCAGTTGAGCCAGCACCATTTGTTGAAAATGCTGTCTTTTTTTTCACT  
GGATGGTTTTAGCTCCCTTGACAAATATCAAGTGGCCATAGGTGTGTGGGTTCAATTTTGTGTCTTCAA  
TTCTATTCCATTGATCTACCTGTCTGTCTGCTGTACCATGCAGTTTTTTGTTTTTTGTTTTTTGTTTTTT  
TTTTTTTTTTTTTTTTTACAATTGCTCTGTAGTACAGCTTGAGGTGAGGCATGGTGATTCCACCAGAGGT  
CTTTTATTGTTGAGAATAGTTTTTGGTATCCTAGGTTTTTTGTTTTTCCAGATTAATTTGCAAATTTTC  
CTTTCTAACTCTGTGAAAAGTTGAGTTGGTATATTGATGGAGATTGCATTGAATCTGTAGATTGCTTTT  
AGCAAGATAGCCATTTTAAATATTTTAAATCCTGCCAATCCATGAGCATGGGAGATCTTTCCATCTTCTG  
AAATCTTCTTCGATTTCTTTCTTCATAGACTTGAAGTTCTTATCATACAGATCTTTCACCTCCTTAGTT  
AGAGTCACACCAAGGTATTTTATATTATTTGTGACTATTGTGAAGGGTGTGTTTCTCTAATTTTTTTTA  
TCAGCCTGTTTATCCTTTGTGTAGAGAAAGGCCACTGATTTGTTTGCATGAATTTTATATTCACTACT  
GCACTGAAGCTGTTTATCAGGTTTAGGAGTTCTCTGGTGGAATTTTLAGGGTCACTTATATATACTATC  
ATATCATCTGCAAAGAGTGATATTTTGACTTCTTCCCTTTTCAATTTGTATCCCCCTTGATCTCCTTTTGT  
TGTTGAATTGTTCTGGCTAGGACTTCAAGTACTATATTGAATAGGTATGGAGAAAGTGGGCAGCCCTGT  
CTAGTCCCTGATTTTAGTGGGATTGCTTCCAGCTTCTCACCATTTACTTTGATGTTGGCTACTGGTTTG  
CTGTAGATTGCTTTTATCATGTTTAAAGTATGGGCCTTGAATTCCTGATCTTTCCAAGACTTTTATCATG  
AATGGGTGTTGAATTTTGTCAAATGCTCTCTCAGCATCTAACGAGATGATCATGCAGTTTTTGTCTTTG



AGTTTCTTTATATTGTGGATTACGTTGATGGATTTCTGTATATTAACTATCCCTGCATCCCTGGATGG  
AAGCTTACTTGATCATGATGGATGATCATTTTACTTGTCTTGGATTGAGTTTGTGAGAATTTTATTG  
AATATTTTTGCATCGATATTCATAAGGGAAATTGGTCTGAAGTTCTCTTTCCCTTTTTTGGGTCTTTGTG  
TGGTTTAGGTATCAGAGTAATTGTGGCTTCATAGAATGAATTGGATAGAGTACCTTCTGCTTCTATTTT  
GTGAAATTGTCTGAGGAGAATTTGAATTAGGTCTTCTTTGAAGGTCTGATAGAACTCTGTACTAAACTC  
ATCTGTTCCCTGGGCTTTTTTGGTTGGGAGACTATTAATGACTGCTTCTATTTCTTTAGGGTATATGGGG  
CTATTTAGATCATTAATCTGATCCTGATTTAACATTGATACCTGGTATCTATCTAGAAAATTGTCCATT  
TCATCCAGGTTTTCCAGTTTTTGTGAGTATAGCCTTTTTGTTGTGGGATATGATGATGTTTTGGATTTC  
CTCAGGTTCTGTTGTTATGTCTCCCTTTTCATTTCTGATTTTGTAAATTATGATACTGTTCTGTGCCC  
TCTAGTTAGTCTGGCTAAGGGTTTATCTATCTTGTGATTTTCTCAAAAACCAGTTCCCAGTTTGGTT  
GATTCTTTTTGTTTCTACTCGGTTGATTTTCTGATCCTGGGTTTGTATTATTTCCAGATGTCTACTTCTCTT  
GGGTGAATTTGCTTCTGCTGTTCTAGAGCTTTTAGGTATACTGTCAAGCTGCTAGTGTACGCTCTCTCT  
AGTTTCTTTTTGGCGGCACTCAGAGCTATGAGTTTTCTCTTAGGATTGCTTTCATTGTGTCCCATAG  
TTTGGGTATGTTGTGGCTTCATTTTCTTAACTCTAGAAAGGCTTTAATTTCTTTCTTTCTTTCTTTCT  
TTTCTTTCTTTCTTTCTTTCTTTCTTTCTTTCTTTCTTTCTTTCTTTCTTTCTTTCTTTCTTTCTTTCT  
TCCTTCCTTCCTTCCTTTCTTTCTTTCTTTCTTTCTTTCTTTCTTTCTTTCTTTCTTTCTTTCTTTCT  
ATTGAGTAGAGTGTTGTTTCTGCTTCCACATCAACATTTTCTGCTGGGTATAGTAGCCTGGTCTGGCATTG  
TGTTCTCTTAGGGTCTGTATAACATCTGTCCAGGATCTTCTTAGTCTTTTCTAGTCTCTGGTGAGAAGT  
CTGGTGTAATTCTAATAGGTCTGCCTTTATATGTTACTTGATCTTTTTTTCCCTTACTGCTTTTAATAT  
TCTATTTTCACTTAGTGCTTTGTTGTTCTGATTATTATGTGTGCGGAGGAATTTCTTTTCTGGTCCAG  
TCTATTTGGAGTTCTGTAGGCTTCTTGTATGTTTCTATGGGCATCTCTCTCCTTAGGTTAGGGAAGTTTC  
TTCTATAATTTTGTGAGATATTTACTGGCCCTTTAAGTTGAAAGTCTTCATTCTCATATATACCTAT  
TATCCGTAGGTTTGGTCTTTTTCATTGTGTCTCAATTTCTTGGATATTATGAGTGAGGATCTTTTGTGA  
TTTTGCATTTTCTTTGATTGTTGTATCCATGTTTTCTATGGAATCTTCTGTACCTGAGATTCTCTCTTT  
CATTTTTTTTTGTATTCTGTTGCTGATGCTTGCATCTATGGTTCTGATTTCTTTCTTAGGATTTCTATC  
TCCAGAGTTGACACCCTTTGTGATTTCTTTATGTTTCTACTTCCATTTTCTAGATCCTGGATGGTTTTG  
TTCAATTCTTTACCTGTTTGGTAGTGTTTCCCTTTAGCTCTTTAAGGGATTTTTGTATTTCTCTTTA  
AGGGCTTCTAGCTGTTTACCTGTGTTCTCCTGTATTTCTTTAAGCGAGTCATTCTTTCTTTCTTAAAC  
TTCTCCATCATCATCATGAGAAGTGAGTTTAGATCCATATCTTGCTTTTCCGGTGTGATGGTGTATCCA  
GGACTTGCTATGGTGGGAGAATTTGGTTCTGATGATGCCTTGGTTTCTGTTGCTTCTGTTCTTATGCTT  
GCCTCCTGCCATCTGATTATCTCAAGTGCTTGCAGAGCTCAATTTATGTGGTTGGAACCTGTTCTTCT  
ATAATCCTGGTTGATTCAGGACTTCTTAGAGTCTAGCTTTCTCTGTGATCCTGTGATTCCAGGATCCCG  
TGAACCTGAGATTCTGGGTGTGTGAGAGTTCTTGGCAGTCAAGCTTCTCTGAGACCCTGAGATCCTGT  
TGTGACCAAGCTCCTGTTATCCTGGTATCCTGAAATCCTAAGATCCTGGGCATGTTACAGCGCCTGGAA  
CTGGTGTTTCTCTAGGGAGCATGGGGCTGTCTGGTGTTTTTGAACCAAGGTATAACAGCACTGATCA  
GAAGGAACCTGAGATGCTGGTCAAGCAGGGCTCCTGTATCCCTGCTCCTGTGTACAGGCCCATCATG  
ATTGGTTTGAACAGATGTTGTATTCTACTCACCAGTGATCCTAAGGTCCTGGGCGTGCTAGGGTGCTT  
GCGGCTTGGAGAGTCTCTGAGGACTGTCCGTGAGTTCGTTCCCAAAGTGGCCAGAGCTGGCGCCGA  
CTGGAAGGGCACTATTATAATTTTCAATCCTCTGTAAAATTTTTGTTTTTTTCTATTTTGCATGTGTGT  
ATTGTGGATATTTTTGCATGTGTGTGGGCATGCATGCAAGTGTGTACAGCAAGTTGGTGTCTGTCCAGA  
TTCATGCTCGCTTGCTCTTATACGTTATTCTTGAGGGAAAGTCTCTTCATTAAACCCAGCACTTAACTA  
TGCGGCCAACCTTACTAGCAAGCTAACACTGTGGATTCCCTGTCTCTGCCTCCTGAAGCTAGAATTACA  
GGTGGTGGCCATGCCTACCTGGCACTTAGCTGGGTTTCTGCAGATCCAAATGCTGGCCCTCAAGTTTGC  
AGAGCAAGCACTTTCAGCACTAAGCCAGCTATACAGCCCTGATCTGTAATTTGTAATTGTCAATTTTCAT  
AACTTATCTAGATATGGAGAAAGTCACCTACATTGCTGTTAACTCCTGGTCTTCAGGAATGGCCCAT



TTAACCCCTCAGACACCCAAGTGACCATCTTTCTCTCTTGCTGATAATGTTTCAGATATTCATTCTTCTG  
CCACCATTTCCGGAGATTAGACTTCCATCTGCTCACTGATTCCACCTCCATGAGACTTTTACATCCAGT  
GTGTATTAGTTAGGCTGTCCTGGGATATTTTGCATCTGAAAAAGATGCTGTACTTGCCGAAGTGGGATT  
AGAACAGGAGTCAGAATGTGTGCTGATGAATGACAGTATCTTCATAGCATTAGCTTGTGAGCTATGAGT  
AAATAAAAGATTTACATTTGCATGGTTCCCAGAGCTTAGATTATTTAAACCTGCATTGGTTACATGCA  
CTACAGATAGCTTCAGAAGTACCCAAATGTGTTGGTGTACATAAAATAAAAGAATATTCACACTTACCC  
TTGGATTTCATTTGATCAAGAACAACTCAAGTTTGAATTTTTTTTTCTCTCCCTGTGTCTCTGTCCATCT  
GTCTGTCTTAATTTGAGGTTTGGGGTTGTCAATTATTCTATCGGTTGCTGAGTCCTTGTGTCTGTATCT  
ACCTGTAGCCATTTGGTGGCTTATTGTCTCTTTCTTTGTGTCCCTAACAAATTGTTTTGCTCTGTATTG  
ACTGAACATTATAGCATCACATGGGATGGAATGAAAGCCACTTTACATAAATTTTTACCAGAGTTTAGC  
AAGGGATTAGGTCAGTCACTGACTCCAGCTGACCCCAAAGCACTCAGTTTTTAAACATACTATTTTCAAGTT  
ATAACTGTATGTTGTACCCAATATTTATGGTAGAAGTTTGCATACAAGATCTTTTTTATACCTGTATCAT  
GTTTTTCAGGGTTGACTAGCATAACACAAGTACATGCATACATTGCTCTTTGCATCAGGAGAGTGGCATA  
GTACATAATTTAAATTTAGAGATATGTACTAACTTATGTTGTGACTGATACATGGGAAATCCAAGGTTA  
GTGGGGTTGACTGTTATGTTATTCTCTTAAAGTAGATTAAAAATCAGGCTTAGGGAAACAGTATGACATC  
AGGATAAGTCTTAAGACATCTCAAGGGGCATTAGCAACTTGACTATATGGTCCAACAAAAGTTCCAGTC  
TCTTAGAAATGTGATCTATTTTCGTAATAATGCATCTCTATAACAATCTAACTGGAAAACGATTAATGG  
CTGCCATTTTTATTATTTCTGTTTAAATCTTGATAATGAGATATCCCCCAAAAATAAAAGTTAAGCCAG  
TGGGAAGTTTGTACCCCTCCAGTAGATTGGGAAAATGGCACTTCCAGTCACTGCAAGGGGCAGGATGATC  
TTTATACAGCAAGGTTAGTGTTAATGTGATGGCTCATGTGGATAATTGGAAGAAACCAATGAGTCAGAG  
GTGGGATTGCTCAACTATGAAGCATGGCACAGAATGTGCTTAGAAAGGGACTCTCCAGTTTAGCCTACA  
GGAGAGAGGTTTTTTGGAATCTAAGAATTTGAGCTTTGAGACCTTGAACCCCGAAGAAGTAGACCATGAA  
ACTCATACAACAGCAAACCAAAGACAAGCCCCAAACCACAACTACAGATAGAAGACACAGGGTGGGAA  
GAGGAGAAGTCAAGCTGTGAGTTTGGCTTTTGGTCAAATCAATCCAAGGATTAAGTGTGAGTTTTGCCCA  
TTAATGTAACAGACATGTTTTGGTACCTTTGAGATTAGTTGTAATGTGTCTAATGGATATAGACTGTAA  
ATAATCTCTAGGTGCCACATAAATTTATATGTCTTATCACTCCCCCATTTTATAGAGCATATCTATGAA  
AATAACTAACACTCCACACACTCATTTGAATGCCTCTTGTATTCAAAGTGCCGATTTTATTGTGGTGCC  
TTATCCACCCAACCCCTAATAGTAGGTCCCATCTACTACTGGTGAGCAATTGTCAAATGGTAAGTAGAG  
TTTCCTTAAAGAGTATCTGTTGGAGCAGTGTGTAACACATTTAAGAAGACAAGTTGTACTTTGTAAATA  
AGCATTCTGGCATTACTTATGGATTGCCCATGCAGAGTGGATTTATTCCTCTTTGCTGAGGATGCACTC  
ATCTGTGACTAAGTGATAAGGGGATGTAACACGGAGTTACTTACATTTTCCTTGAAGTGGGGTTTTATC  
TGTTTTAACTATGAACTGTGATCTTCATGAGGACAGTAAATGCATCTAATTTCTGCATGGCCAAAGCC  
TCTCTCTGTGCTGGAAAGATAGGAAGTCAAAAATTCAAATAAAAAACAGACTCAAGCTGGGCGTGGTGG  
CCCACGCCTTTAATCCCAGCACTCAGGAGGCAGAGGCAGGTGGATTTCTGAGTTTCGAGGCCAGCCTGGT  
CTACAGAGTGAGTTCCAGGACAGCCAGGGCTACACAGAGAAACCCTGTCTCGAAAAAAACCAAAAAAA  
AAAAAAGAAAGAAAGAAATGAAAGGAAGAAAGGAAGGAAGGAAGGAAGAAAGAAAGAAACAGACTC  
AACTAGCCAGGCAGTCTCAGTGTGGAGTGAGCGCTGCAAAGGAACAGGTTTGAGCAAGAGTCCGGAAGC  
AGGTGTGTGAGGTGAAGGCGGTTAGCTTGATACGGTGAGTTACTGGTGAGGAAGGTGAATTGAAGGCAG  
CTCACTTGGCAATATGTTTGTCTTGAAACATGAGGACCTTGATTGCTCCCCATAAACACATTTTAAAA  
AGCTGGGTGTGGTGGTGCACAGGGGACTGGCGGATCCTTAGGACTTGTTGGCCAACCAGTTCTGACAAG  
TCAGTGCTGTCTCAAAATAAAAAAGTGGAAAGAGACAGAGGAAAACACCTCATGTCTAGGTCTAGTTTAC  
ACACAACACCACACACCCCCCACACACACACACATAGACACACATACCCACACACATAGACACACATA  
TACTCACACATACACACACACACACACACACACACACACACACACAAATACATCACCACACACAGAC  
ACACACAGACATGCATACAGATGTACTCACACATACACACATAACAACACAAACACACATACACACAACA  
CACACCACACATACATATCACACACATACATATACACTCACACATATACAAATATACATTCACTCACAC



ACAGCCACACACAGCCACACTCACACAGCCACACAACACAAACATACAGACACACATATAACACAGATA  
CACACACACACACAAACACACACACACAGGAATGGCATGTGAGCCTCTTCTAAGACACACAAATATGAG  
CCTTTTCATTTTCTGTGGTTGCTGTAATGACAAGAGAGAAAGGCATTCTACAGATTGGTAGTTGCTTGAG  
CCCTGAAGAAAGTTCTATGAGGTTTTCTCGTTATAGACTGATGTACGTGGGTTCTTTTCTCTCATTTCAG  
GCCTCCAATTAGTTGGTATACACTGGATTCTGTAAAGCAAACCTCTCATCCATGGAGAGTCGAGTCTCTT  
GTGTGGTTTTAAACAGTCATTATCCAACCTCACCGGGGCTTGCAATCCTGACAAAGGCGCTTGGCATCCTG  
GGGTAGGAGTCCACTGGGGGAGGTGGCCTTGAGGTGGAGAAGAATATTCTTCATCTGCAGCCTTCCTCC  
ATGAAATCTTTGCAGTTCTTCTCAGCTCCCATTAGACTTAGTGTTTGTATCACCCATTTTGTGTGTAT  
CCTTACCAAGTCTTCTTGAGATAGATATAAATAGAAATAAACAGATCTCTCTCTCTCTCTCTCTCTCTC  
TCTCTCTCTCTCTCTCTCTGTGTGTGTGTGTGTGTGTGTGTGTGTGTGTGTGTGTGTGTGTGTGTGTGT  
TCTATCTTATCTCTCTCTGTGTGTGTGTGTGTGTGTGTGTGTGTGTGTGTGTGTGTGTGTGTGTGTGT  
ACACACACACACACACACACACACACAGAGAGAGAGAGAGAGAGAGAGAGAGAGAGAGAGAGAGAGAGAA  
GTAAGTGATGAGCATCTACCCCTCCCTTTCTCTCTCTATGTTGATTGTCAGCTTGAATTGATTGAGAAGT  
GCCAAAGAATTTAAAGAGAAACTCTAGGTGTGTCTGTGAGGGTATTTCCAGTGAAGCCTAATAAGAGGA  
AAATACCTGCCCTGCATGTGGGTGGCACCATCCCATAGTCTGTGCTCCAGATGAAACAAATAGGCCAAAA  
GAGAAAGCGGATTACTGCTGTCAATTCTTTCTAATCCTGGCCTCCATGGTATGTTCTCCTGTGCCCCACC  
CCATACTTCTCATGATGGACAAGTACATTAAATCTCGTCTTCTTTAAGTTGTTTCATGTCAAGTCTTTTT  
GTTAAAGTGACAAATCGCTACTAGCACAGTAACCTCCATCTTTTTGTCCATTAACCTCACTATCCTACT  
ATCTGTCCATCCATCCATCCATCCATCCATCCATCCATCTATCCATGCATCTATCATCTATTCTCTCTC  
TCTCTTTCATCTATTACCTATCTGTCATTCTATGTCTGTATATCATCTATCTAATCTATCTATCATCTC  
TGTCTGTCTGTCTGTCTGTTTATCTATATTATGCATTGTCTTCTGGTTAGATGGTCAATATCTAAGATT  
TAGGTTGTAAGTGACTCTGTAGATATTGGGCAGTGGTTCTTCAATCTTCCTGAGGCTATGACCCTTTAA  
TACAGTTGCTCATGTTGTGATAACCTCCACCTATACAATTAGTTTGCTGCTCCTCCACAACCTATAATTT  
TGCTACTGTTATAGATCATATGAAATGTAAATATCTGACATGTGACCATGAAGGGGCTGCAACCCACAG  
GTTGAGGAACAGTGATATAGACACATTTCCGCACAGTTCATAGGTTAATGCTGACAGAGAGACTAGAAT  
TTGCTAGCACTCATTCCTTTCTTGTGTGTGTGCCTGTAGGGTTGTGAAGAGATTAAAGCGGGGAAAAAG  
TACAGCCCTTCAGGAGCAAAGCTTCTTGTGAACAACGTTGCTGTGGAGGACGGCGGGAGCTATGCGTGC  
TCAGCCAGACTGACTCACTTGGGGAGACACTTCACCATTAGAACTACATTGCTGTGAACACCAGTAAG  
GTTTTGTTTTTGTTCATATGTTTGTGCTTGGTTCTCAGCTTTATGGGAGCCAGATGGCTTCCTGCTT  
CAAGTTTCAGAGATTGGATATTGATTGTACAGAGCCCCCCCCCAGCCATGCTGGTGATAGATCAGGG  
GGCCAGAGAGAGGGGCAATGGGCACAACCAGCTAGGCACAACCAGCTCACTTTTCTCTCCTTTAAAAA  
CACAATATTGAAAACCTCTTGGCTGGAGAACATTGAAAGAGATCATGTAAAAGGGGGGAACTTCCTGGTT  
GCCTACCAAAGTGTCAGCGTCCAGCACAAATGTAGACAGTACTAATTCTACCTTCATTTCCCATCATCTC  
TGCTGTTTTAGTGTCGTGCTGG
