# Supplementary material for: Floxed Il1rl2 Locus with mCherry Reporter Element Reveals Distinct Expression Patterns of the IL-36 Receptor in Barrier Tissues
Source: Cells. 2024 May 6;13(9):787. doi: 10.3390/cells13090787 (PMC11083296; doi:10.3390/cells13090787)
Supplement: Supplementary file 1 [file cells-13-00787-s001.zip]

Archive with 5 entries (5 files):
- Cover Letter 040824.pdf
- Supplemental file S1.pdf
- Supplemental file S2.pdf
- Supplemental file S3.pdf
- Supplemental file S4.pdf
